# Supplementary material for: The Incidence of Wolbachia Bacterial Endosymbiont in Bisexual and Parthenogenetic Populations of the Psyllid Genus Cacopsylla (Hemiptera, Psylloidea)
Source: MDPI journal article supplement (doi:10.3390/insects12100853), 2021-09-22
Supplement: s1 [file s1]

Table S1. List of studied material.

| Taxon                | Sample ID  | Sex | <i>Wolbachia 16S</i> | <i>Wolbachia wsp</i> | 2n    | Locality                                                                                                                          |
|----------------------|------------|-----|----------------------|----------------------|-------|-----------------------------------------------------------------------------------------------------------------------------------|
| <i>C. lapponica</i>  | CLAPP-M_m1 | m   | +                    | +                    | 24+X0 | FINLAND, Lapland province, Kilpisjärvi, Pikku-Malla, 69°08'56"N; 20°44'20"E, h = 610 m, 27.07.2014, S. Nokkala & Ch. Nokkala leg. |
| <i>C. lapponica</i>  | CLAPP-M_m3 | m   | +                    | +                    | 24+X0 | FINLAND, Lapland province, Kilpisjärvi, Pikku-Malla, 69°08'56"N; 20°44'20"E, h = 610 m, 27.07.2014, S. Nokkala & Ch. Nokkala leg. |
| <i>C. lapponica</i>  | CLAPP-M_f2 | f   | +                    | +                    | 24+XX | FINLAND, Lapland province, Kilpisjärvi, Pikku-Malla, 69°08'56"N; 20°44'20"E, h = 610 m, 27.07.2014, S. Nokkala & Ch. Nokkala leg. |
| <i>C. lapponica</i>  | CLAPP-M_f4 | f   | +                    | +                    | 24+XX | FINLAND, Lapland province, Kilpisjärvi, Pikku-Malla, 69°08'56"N; 20°44'20"E, h = 610 m, 27.07.2014, S. Nokkala & Ch. Nokkala leg. |
| <i>C. lapponica</i>  | CLAPP-M_f5 | f   | +                    | +                    |       | FINLAND, Lapland province, Kilpisjärvi, Pikku-Malla, 69°08'56"N; 20°44'20"E, h = 610 m, 27.07.2014, S. Nokkala & Ch. Nokkala leg. |
| <i>C. lapponica</i>  | CLAPP-M_f6 | f   | +                    | +                    |       | FINLAND, Lapland province, Kilpisjärvi, Pikku-Malla, 69°08'56"N; 20°44'20"E, h = 610 m, 27.07.2014, S. Nokkala & Ch. Nokkala leg. |
| <i>C. lapponica</i>  | CLAPP_f1   | f   | +                    | +                    |       | FINLAND, Lapland province, Utsjoki, Ailigas, 69°53'51"N; 27°03'32"E, 28.07.2020, S. Nokkala & Ch. Nokkala leg.                    |
| <i>C. lapponica</i>  | CLAPP_f2   | f   | +                    | -                    |       | FINLAND, Lapland province, Utsjoki, Ailigas, 69°53'51"N; 27°03'32"E, 28.07.2020, S. Nokkala & Ch. Nokkala leg.                    |
| <i>C. lapponica</i>  | CLAPP_f3   | f   | -                    | -                    |       | FINLAND, Lapland province, Utsjoki, Ailigas, 69°53'51"N; 27°03'32"E, 28.07.2020, S. Nokkala & Ch. Nokkala leg.                    |
| <i>C. lapponica</i>  | CLAPP_f4   | f   | +                    | +                    |       | FINLAND, Lapland province, Utsjoki, Ailigas, 69°53'51"N; 27°03'32"E, 28.07.2020, S. Nokkala & Ch. Nokkala leg.                    |
| <i>C. lapponica</i>  | CLAPP_f5   | f   | +                    | +                    |       | FINLAND, Lapland province, Utsjoki, Ailigas, 69°53'51"N; 27°03'32"E, 28.07.2020, S. Nokkala & Ch. Nokkala leg.                    |
| <i>C. lapponica</i>  | CLAPP_f6   | f   | -                    | -                    |       | FINLAND, Lapland province, Utsjoki, Ailigas, 69°53'51"N; 27°03'32"E, 28.07.2020, S. Nokkala & Ch. Nokkala leg.                    |
| <i>C. fraudatrix</i> | CFR_SP_m   | m   | -                    | -                    |       | POLAND, Bieszczady Mts, Wielka Rawka, 49°06'N; 22°35'E, 07.08.2009, V. Kuznetsova & A. Maryńska-Nadahowska leg.                   |
| <i>C. fraudatrix</i> | CFR_f1     | f   | n/a                  | -                    |       | POLAND, Bieszczady Mts, Wielka Rawka, 49°06'N; 22°35'E, 07.08.2009, V. Kuznetsova & A. Maryńska-Nadahowska leg.                   |
| <i>C. fraudatrix</i> | CFR_f5     | f   | n/a                  | +                    |       | POLAND, Bieszczady Mts, Wielka Rawka, 49°06'N; 22°35'E, 07.08.2009, V. Kuznetsova & A. Maryńska-Nadahowska leg.                   |
| <i>C. fraudatrix</i> | CFR_f7     | f   | +                    | +                    |       | POLAND, Bieszczady Mts, Wielka Rawka, 49°06'N; 22°35'E, 07.08.2009, V. Kuznetsova & A. Maryńska-Nadahowska leg.                   |
| <i>C. fraudatrix</i> | CFR_f8     | f   | +                    | +                    |       | POLAND, Bieszczady Mts, Wielka Rawka, 49°06'N; 22°35'E, 07.08.2009, V. Kuznetsova & A. Maryńska-Nadahowska leg.                   |
| <i>C. fraudatrix</i> | CFR_f9     | f   | +                    | +                    |       | POLAND, Bieszczady Mts, Wielka Rawka, 49°06'N; 22°35'E, 07.08.2009, V. Kuznetsova & A. Maryńska-Nadahowska leg.                   |

|                    |               |   |   |   |                                                                                                                 |
|--------------------|---------------|---|---|---|-----------------------------------------------------------------------------------------------------------------|
| <i>C. borealis</i> | CBST_f1       | f | + | + | FINLAND, Lapland province, Tuntsantie, 67°18'11"N; 29°16'18"E, 01.08.2019, S. Nokkala & Ch. Nokkala leg.        |
| <i>C. borealis</i> | CBST_f3       | f | + | + | FINLAND, Lapland province, Tuntsantie, 67°18'11"N; 29°16'18"E, 01.08.2019, S. Nokkala & Ch. Nokkala leg.        |
| <i>C. borealis</i> | CBST_f4       | f | + | + | FINLAND, Lapland province, Tuntsantie, 67°18'11"N; 29°16'18"E, 01.08.2019, S. Nokkala & Ch. Nokkala leg.        |
| <i>C. borealis</i> | CBST_f5       | f | + | + | FINLAND, Lapland province, Tuntsantie, 67°18'11"N; 29°16'18"E, 01.08.2019, S. Nokkala & Ch. Nokkala leg.        |
| <i>C. borealis</i> | CBST_f6       | f | + | + | FINLAND, Lapland province, Tuntsantie, 67°18'11"N; 29°16'18"E, 01.08.2019, S. Nokkala & Ch. Nokkala leg.        |
| <i>C. borealis</i> | CBST_f7       | f | - | - | FINLAND, Lapland province, Tuntsantie, 67°18'11"N; 29°16'18"E, 01.08.2019, S. Nokkala & Ch. Nokkala leg.        |
| <i>C. borealis</i> | CBST_f8       | f | - | - | FINLAND, Lapland province, Tuntsantie, 67°18'11"N; 29°16'18"E, 01.08.2019, S. Nokkala & Ch. Nokkala leg.        |
| <i>C. borealis</i> | CBST_f9       | f | - | - | FINLAND, Lapland province, Tuntsantie, 67°18'11"N; 29°16'18"E, 01.08.2019, S. Nokkala & Ch. Nokkala leg.        |
| <i>C. borealis</i> | CBST_f10      | f | - | - | FINLAND, Lapland province, Tuntsantie, 67°18'11"N; 29°16'18"E, 01.08.2019, S. Nokkala & Ch. Nokkala leg.        |
| <i>C. borealis</i> | CBST_f11      | f | - | - | FINLAND, Lapland province, Tuntsantie, 67°18'11"N; 29°16'18"E, 01.08.2019, S. Nokkala & Ch. Nokkala leg.        |
| <i>C. borealis</i> | CBST_f12      | f | - | - | FINLAND, Lapland province, Tuntsantie, 67°18'11"N; 29°16'18"E, 01.08.2019, S. Nokkala & Ch. Nokkala leg.        |
| <i>C. borealis</i> | CBST_f13      | f | - | - | FINLAND, Lapland province, Tuntsantie, 67°18'11"N; 29°16'18"E, 01.08.2019, S. Nokkala & Ch. Nokkala leg.        |
| <i>C. borealis</i> | CBST_f14      | f | - | - | FINLAND, Lapland province, Tuntsantie, 67°18'11"N; 29°16'18"E, 01.08.2019, S. Nokkala & Ch. Nokkala leg.        |
| <i>C. borealis</i> | CBST_f15      | f | - | - | FINLAND, Lapland province, Tuntsantie, 67°18'11"N; 29°16'18"E, 01.08.2019, S. Nokkala & Ch. Nokkala leg.        |
| <i>C. borealis</i> | CBST_f16      | f | - | - | FINLAND, Lapland province, Tuntsantie, 67°18'11"N; 29°16'18"E, 01.08.2019, S. Nokkala & Ch. Nokkala leg.        |
| <i>C. borealis</i> | CBST_f17      | f | - | - | FINLAND, Lapland province, Tuntsantie, 67°18'11"N; 29°16'18"E, 01.08.2019, S. Nokkala & Ch. Nokkala leg.        |
| <i>C. borealis</i> | CBST_f18      | f | - | - | FINLAND, Lapland province, Tuntsantie, 67°18'11"N; 29°16'18"E, 01.08.2019, S. Nokkala & Ch. Nokkala leg.        |
| <i>C. borealis</i> | CaborPV_f17-1 | f | - | - | FINLAND, Lapland province, Inari, Pitkävuono, 68°58'56"N; 26°57'18"E, 16.08.2017, S. Nokkala & Ch. Nokkala leg. |
| <i>C. borealis</i> | CaborPV_f17-2 | f | - | - | FINLAND, Lapland province, Inari, Pitkävuono, 68°58'56"N; 26°57'18"E, 16.08.2017, S. Nokkala & Ch. Nokkala leg. |

|                    |               |   |   |   |                                                                                                                 |
|--------------------|---------------|---|---|---|-----------------------------------------------------------------------------------------------------------------|
| <i>C. borealis</i> | CaborPV_f17-3 | f | - | - | FINLAND, Lapland province, Inari, Pitkävuono, 68°58'56"N; 26°57'18"E, 16.08.2017, S. Nokkala & Ch. Nokkala leg. |
| <i>C. borealis</i> | CaborPV_f17-4 | f | - | - | FINLAND, Lapland province, Inari, Pitkävuono, 68°58'56"N; 26°57'18"E, 16.08.2017, S. Nokkala & Ch. Nokkala leg. |
| <i>C. borealis</i> | CaborPV_f17-5 | f | - | - | FINLAND, Lapland province, Inari, Pitkävuono, 68°58'56"N; 26°57'18"E, 16.08.2017, S. Nokkala & Ch. Nokkala leg. |
| <i>C. borealis</i> | CBUH_f17-1    | f | + | - | FINLAND, Lapland province, Utsjoki, Hietala 69°51'06"N; 27°00'34"E, 15.08.2017, S. Nokkala & Ch. Nokkala leg.   |
| <i>C. borealis</i> | CBUH_f17-2    | f | + | - | FINLAND, Lapland province, Utsjoki, Hietala 69°51'06"N; 27°00'34"E, 15.08.2017, S. Nokkala & Ch. Nokkala leg.   |
| <i>C. borealis</i> | CBUH_f17-3    | f | - | - | FINLAND, Lapland province, Utsjoki, Hietala 69°51'06"N; 27°00'34"E, 15.08.2012, S. Nokkala & Ch. Nokkala leg.   |
| <i>C. borealis</i> | CBKK_f1       | f | - | - | FINLAND, Kuusamo, Kantojoki, 66°14'23"N; 29°09'15"E, 02.08.2019, S. Nokkala & Ch. Nokkala leg.                  |
| <i>C. borealis</i> | CBKK_f2       | f | - | - | FINLAND, Kuusamo, Kantojoki, 66°14'23"N; 29°09'15"E, 02.08.2019, S. Nokkala & Ch. Nokkala leg.                  |
| <i>C. borealis</i> | CBKK_f3       | f | - | - | FINLAND, Kuusamo, Kantojoki, 66°14'23"N; 29°09'15"E, 02.08.2019, S. Nokkala & Ch. Nokkala leg.                  |
| <i>C. borealis</i> | CBKK_f4       | f | - | - | FINLAND, Kuusamo, Kantojoki, 66°14'23"N; 29°09'15"E, 02.08.2019, S. Nokkala & Ch. Nokkala leg.                  |
| <i>C. borealis</i> | CBKK_f5       | f | - | - | FINLAND, Kuusamo, Kantojoki, 66°14'23"N; 29°09'15"E, 02.08.2019, S. Nokkala & Ch. Nokkala leg.                  |
| <i>C. borealis</i> | CBKK_f6       | f | - | - | FINLAND, Kuusamo, Kantojoki, 66°14'23"N; 29°09'15"E, 02.08.2019, S. Nokkala & Ch. Nokkala leg.                  |
| <i>C. borealis</i> | CBKK_f7       | f | - | - | FINLAND, Kuusamo, Kantojoki, 66°14'23"N; 29°09'15"E, 02.08.2019, S. Nokkala & Ch. Nokkala leg.                  |
| <i>C. borealis</i> | CBMAG_f1      | f | - | - | RUSSIA, Magadan region, vic. Ola vill., 59°34'24"N; 150°46'04"E, 22.07.2020, Yu. Marusik & D.Berman leg.        |
| <i>C. borealis</i> | CBMAG_f2      | f | - | - | RUSSIA, Magadan region, vic. Ola vill., 59°34'24"N; 150°46'04"E, 22.07.2020, Yu. Marusik & D.Berman leg.        |
| <i>C. borealis</i> | CBMAG_f3      | f | - | - | RUSSIA, Magadan region, vic. Ola vill., 59°34'24"N; 150°46'04"E, 22.07.2020, Yu. Marusik & D.Berman leg.        |
| <i>C. borealis</i> | CBMAG_f4      | f | - | - | RUSSIA, Magadan region, vic. Ola vill., 59°34'24"N; 150°46'04"E, 22.07.2020, Yu. Marusik & D.Berman leg.        |
| <i>C. borealis</i> | CBMAG_f5      | f | - | - | RUSSIA, Magadan region, vic. Ola vill., 59°34'24"N; 150°46'04"E, 22.07.2020, Yu. Marusik & D.Berman leg.        |
| <i>C. borealis</i> | CBMAG_f6      | f | - | - | RUSSIA, Magadan region, vic. Ola vill., 59°34'24"N; 150°46'04"E, 22.07.2020, Yu. Marusik & D.Berman leg.        |

|                    |           |   |   |   |                                                                                                                  |
|--------------------|-----------|---|---|---|------------------------------------------------------------------------------------------------------------------|
| <i>C. borealis</i> | CBMAG-f7  | f | - | - | RUSSIA, Magadan region, vic. Ola vill., 59°34'24"N; 150°46'04"E, 22.07.2020, Yu. Marusik & D.Berman leg.         |
| <i>C. borealis</i> | CBMAG_f8  | f | - | - | RUSSIA, Magadan region, vic. Ola vill., 59°34'24"N; 150°46'04"E, 22.07.2020, Yu. Marusik & D.Berman leg.         |
| <i>C. borealis</i> | CBMAG_f9  | f | - | - | RUSSIA, Magadan region, vic. Ola vill., 59°34'24"N; 150°46'04"E, 22.07.2020, Yu. Marusik & D.Berman leg.         |
| <i>C. borealis</i> | CBMAG_f10 | f | - | - | RUSSIA, Magadan region, vic. Ola vill., 59°34'24"N; 150°46'04"E, 22.07.2020, Yu. Marusik & D.Berman leg.         |
| <i>C. borealis</i> | CBMAG_f11 | f | - | - | RUSSIA, Magadan region, vic. Ola vill., 59°34'24"N; 150°46'04"E, 22.07.2020, Yu. Marusik & D.Berman leg.         |
| <i>C. borealis</i> | CBMAG_f12 | f | - | - | RUSSIA, Magadan region, vic. Ola vill., 59°34'24"N; 150°46'04"E, 22.07.2020, Yu. Marusik & D.Berman leg.         |
| <i>C. borealis</i> | CV_f1     | f | + | + | RUSSIA, Komi Republic, Vorkuta city, 67°27'34"N; 63°59'01"E, 06.08.2013, N. Kabazova & M. Mandelshtam leg.       |
| <i>C. borealis</i> | CV_f11    | f | + | + | RUSSIA, Komi Republic, Vorkuta city, 67°27'34"N; 63°59'01"E, 06.08.2013, N. Kabazova & M. Mandelshtam leg.       |
| <i>C. borealis</i> | CBB_f1    | f | - | - | RUSSIA, Irkutsk region, Lake Baikal, vic. Bolshye Koty vill. 51°54'25"N, 105°04'14"E, 21.07.2007, E. Labina leg. |
| <i>C. borealis</i> | CBB_f2    | f | - | - | RUSSIA, Irkutsk region, Lake Baikal, vic. Bolshye Koty vill. 51°54'25"N, 105°04'14"E, 21.07.2007, E. Labina leg. |
| <i>C. borealis</i> | CBB_f3    | f | - | - | RUSSIA, Irkutsk region, Lake Baikal, vic. Bolshye Koty vill. 51°54'25"N, 105°04'14"E, 21.07.2007, E. Labina leg. |
| <i>C. borealis</i> | CBB_f4    | f | - | - | RUSSIA, Irkutsk region, Lake Baikal, vic. Bolshye Koty vill. 51°54'25"N, 105°04'14"E, 21.07.2007, E. Labina leg. |
| <i>C. borealis</i> | CBB_f5    | f | - | - | RUSSIA, Irkutsk region, Lake Baikal, vic. Bolshye Koty vill. 51°54'25"N, 105°04'14"E, 21.07.2007, E. Labina leg. |
| <i>C. borealis</i> | CBB_f6    | f | - | - | RUSSIA, Irkutsk region, Lake Baikal, vic. Bolshye Koty vill. 51°54'25"N, 105°04'14"E, 21.07.2007, E. Labina leg. |
| <i>C. borealis</i> | CLB_f7    | f | - | - | RUSSIA, Irkutsk region, Lake Baikal, vic. Bolshye Koty vill. 51°54'25"N, 105°04'14"E, 21.07.2007, E. Labina leg. |
| <i>C. borealis</i> | CLB_f8    | f | - | - | RUSSIA, Irkutsk region, Lake Baikal, vic. Bolshye Koty vill. 51°54'25"N, 105°04'14"E, 21.07.2007, E. Labina leg. |
| <i>C. borealis</i> | CLB_f9    | f | - | - | RUSSIA, Irkutsk region, Lake Baikal, vic. Bolshye Koty vill. 51°54'25"N, 105°04'14"E, 21.07.2007, E. Labina leg. |
| <i>C. borealis</i> | CLB_f10   | f | - | - | RUSSIA, Irkutsk region, Lake Baikal, vic. Bolshye Koty vill. 51°54'25"N, 105°04'14"E, 21.07.2007, E. Labina leg. |
| <i>C. borealis</i> | CLB_f11   | f | - | - | RUSSIA, Irkutsk region, Lake Baikal, vic. Bolshye Koty vill. 51°54'25"N, 105°04'14"E, 21.07.2007, E. Labina leg. |

|                    |             |   |    |    |        |                                                                                                                  |
|--------------------|-------------|---|----|----|--------|------------------------------------------------------------------------------------------------------------------|
| <i>C. borealis</i> | CLB_f12     | f | -  | -  |        | RUSSIA, Irkutsk region, Lake Baikal, vic. Bolshye Koty vill. 51°54'25"N, 105°04'14"E, 21.07.2007, E. Labina leg. |
| <i>C. ledi</i>     | CLSJ_f51D   | f | +  | n\ | 24+XX  | FINLAND, Lapland province, Sevettijärvi, 69°12'58"N; 27°52'14"E, 17.08.2017, S. Nokkala & Ch. Nokkala leg.       |
| <i>C. ledi</i>     | CLSJ_f60D   | f | +  | n\ | 24+XX  | FINLAND, Lapland province, Sevettijärvi, 69°12'58"N; 27°52'14"E, 17.08.2017, S. Nokkala & Ch. Nokkala leg.       |
| <i>C. ledi</i>     | CLSJ_f57T   | f | +  | n\ | 36+XXX | FINLAND, Lapland province, Sevettijärvi, 69°12'58"N; 27°52'14"E, 17.08.2017, S. Nokkala & Ch. Nokkala leg.       |
| <i>C. ledi</i>     | CLSJ_f59T   | f | +  | n\ | 36+XXX | FINLAND, Lapland province, Sevettijärvi, 69°12'58"N; 27°52'14"E, 17.08.2017, S. Nokkala & Ch. Nokkala leg.       |
| <i>C. ledi</i>     | CLSJ_f61T   | f | +  | n\ | 36+XXX | FINLAND, Lapland province, Sevettijärvi, 69°12'58"N; 27°52'14"E, 17.08.2017, S. Nokkala & Ch. Nokkala leg.       |
| <i>C. ledi</i>     | CLSJ_f62T   | f | +  | n\ | 24+XX  | FINLAND, Lapland province, Sevettijärvi, 69°12'58"N; 27°52'14"E, 17.08.2017, S. Nokkala & Ch. Nokkala leg.       |
| <i>C. ledi</i>     | CacoS1_f19T | f | n\ | +  | 36+XXX | FINLAND, Lapland province, Sevettijärvi, 69°12'58"N; 27°52'14"E, 17.08.2017, S. Nokkala & Ch. Nokkala leg.       |
| <i>C. ledi</i>     | CacoS1_f23T | f | n\ | +  | 36+XXX | FINLAND, Lapland province, Sevettijärvi, 69°12'58"N; 27°52'14"E, 17.08.2017, S. Nokkala & Ch. Nokkala leg.       |
| <i>C. ledi</i>     | CacoS1_f1D  | f | n\ | +  | 24+XX  | FINLAND, Lapland province, Sevettijärvi, 69°12'58"N; 27°52'14"E, 17.08.2017, S. Nokkala & Ch. Nokkala leg.       |
| <i>C. ledi</i>     | CacoS1_f16D | f | n\ | +  | 24+XX  | FINLAND, Lapland province, Sevettijärvi, 69°12'58"N; 27°52'14"E, 17.08.2017, S. Nokkala & Ch. Nokkala leg.       |
| <i>C. ledi</i>     | CacoS1_m2   | m | n\ | +  | 24+X0  | FINLAND, Lapland province, Sevettijärvi, 69°12'58"N; 27°52'14"E, 17.08.2017, S. Nokkala & Ch. Nokkala leg.       |
| <i>C. ledi</i>     | CacoS1_m3   | m | n\ | +  | 24+X0  | FINLAND, Lapland province, Sevettijärvi, 69°12'58"N; 27°52'14"E, 17.08.2017, S. Nokkala & Ch. Nokkala leg.       |
| <i>C. ledi</i>     | CLSJ_f1     | f | +  | n\ |        | FINLAND, Oulu province, Siikajoki, 64°39'32"N; 25°19'33"E, 10.08.2018, S. Nokkala & Ch. Nokkala leg.             |
| <i>C. ledi</i>     | CLSJ_f2     | f | +  | n\ |        | FINLAND, Oulu province, Siikajoki, 64°39'32"N; 25°19'33"E, 10.08.2018, S. Nokkala & Ch. Nokkala leg.             |
| <i>C. ledi</i>     | CLSJ_f3     | f | +  | n\ |        | FINLAND, Oulu province, Siikajoki, 64°39'32"N; 25°19'33"E, 10.08.2018, S. Nokkala & Ch. Nokkala leg.             |
| <i>C. ledi</i>     | CLKH_m30    | m | +  | n\ |        | FINLAND, Oulu province, Kuhmo, Syväjärvi, 64°11'40"N; 29°57'49"E, 04.08.2019, S. Nokkala & Ch. Nokkala leg.      |
| <i>C. ledi</i>     | CLKH_m31    | m | +  | n\ | 24+X0  | FINLAND, Oulu province, Kuhmo, Syväjärvi, 64°11'40"N; 29°57'49"E, 04.08.2019, S. Nokkala & Ch. Nokkala leg.      |
| <i>C. ledi</i>     | CLKH_m32    | m | +  | n\ | 24+X0  | FINLAND, Oulu province, Kuhmo, Syväjärvi, 64°11'40"N; 29°57'49"E, 04.08.2019, S. Nokkala & Ch. Nokkala leg.      |

|                |          |   |   |    |        |                                                                                                                           |
|----------------|----------|---|---|----|--------|---------------------------------------------------------------------------------------------------------------------------|
| <i>C. ledi</i> | CLKH_m33 | m | + | n\ |        | FINLAND, Oulu province, Kuhmo, Syväjärvi, 64°11'40"N; 29°57'49"E, 04.08.2019, S. Nokkala & Ch. Nokkala leg.               |
| <i>C. ledi</i> | CLKH_m34 | m | + | n\ |        | FINLAND, Oulu province, Kuhmo, Syväjärvi, 64°11'40"N; 29°57'49"E, 04.08.2019, S. Nokkala & Ch. Nokkala leg.               |
| <i>C. ledi</i> | CLKH_m35 | m | + | n\ |        | FINLAND, Oulu province, Kuhmo, Syväjärvi, 64°11'40"N; 29°57'49"E, 04.08.2019, S. Nokkala & Ch. Nokkala leg.               |
| <i>C. ledi</i> | CLKH_f1T | f | + | +  | 36+XXX | FINLAND, Oulu province, Kuhmo, Syväjärvi, 64°11'40"N; 29°57'49"E, 04.08.2019, S. Nokkala & Ch. Nokkala leg.               |
| <i>C. ledi</i> | CLKH_f2D | f | + | +  | 24+XX  | FINLAND, Oulu province, Kuhmo, Syväjärvi, 64°11'40"N; 29°57'49"E, 04.08.2019, S. Nokkala & Ch. Nokkala leg.               |
| <i>C. ledi</i> | CLKH_f3D | f | + | +  | 24+XX  | FINLAND, Oulu province, Kuhmo, Syväjärvi, 64°11'40"N; 29°57'49"E, 04.08.2019, S. Nokkala & Ch. Nokkala leg.               |
| <i>C. ledi</i> | CLKH_f4T | f | + | +  | 36+XXX | FINLAND, Oulu province, Kuhmo, Syväjärvi, 64°11'40"N; 29°57'49"E, 04.08.2019, S. Nokkala & Ch. Nokkala leg.               |
| <i>C. ledi</i> | CLKH_f5T | f | + | +  | 36+XXX | FINLAND, Oulu province, Kuhmo, Syväjärvi, 64°11'40"N; 29°57'49"E, 04.08.2019, S. Nokkala & Ch. Nokkala leg.               |
| <i>C. ledi</i> | CLKH_f6T | f | + | +  | 36+XXX | FINLAND, Oulu province, Kuhmo, Syväjärvi, 64°11'40"N; 29°57'49"E, 04.08.2019, S. Nokkala & Ch. Nokkala leg.               |
| <i>C. ledi</i> | CLYL_m1  | m | + |    | 24+X0  | FINLAND, Western Finland province, Yläne, 60°53'10"N; 22°26'41"E, 15.08.2019, S. Nokkala & Ch. Nokkala leg.               |
| <i>C. ledi</i> | CLYL_m2  | m | + |    | 24+X0  | FINLAND, Western Finland province, Yläne, 60°53'10"N; 22°26'41"E, 15.08.2019, S. Nokkala & Ch. Nokkala leg.               |
| <i>C. ledi</i> | CLYL_m3  | m | + |    | 24+X0  | FINLAND, Western Finland province, Yläne, 60°53'10"N; 22°26'41"E, 15.08.2019, S. Nokkala & Ch. Nokkala leg.               |
| <i>C. ledi</i> | CLYL_m4  | m | + |    | 24+X0  | FINLAND, Western Finland province, Yläne, 60°53'10"N; 22°26'41"E, 15.08.2019, S. Nokkala & Ch. Nokkala leg.               |
| <i>C. ledi</i> | CLYL_m5  | m | + |    |        | FINLAND, Western Finland province, Yläne, 60°53'10"N; 22°26'41"E, 15.08.2019, S. Nokkala & Ch. Nokkala leg.               |
| <i>C. ledi</i> | CLYL_m6  | m | + |    |        | FINLAND, Western Finland province, Yläne, 60°53'10"N; 22°26'41"E, 15.08.2019, S. Nokkala & Ch. Nokkala leg.               |
| <i>C. ledi</i> | CLLMR_m1 | m | + |    | 24+X0  | FINLAND, Western Finland province, Pöytyä, Lammenrahka, 60°44'37"N; 22°25'32"E, 16.08.2018, S. Nokkala & Ch. Nokkala leg. |
| <i>C. ledi</i> | CLLMR_m2 | m | + |    | 24+X0  | FINLAND, Western Finland province, Pöytyä, Lammenrahka, 60°44'37"N; 22°25'32"E, 16.08.2018, S. Nokkala & Ch. Nokkala leg. |
| <i>C. ledi</i> | CLLMR_m3 | m | + |    | 24+X0  | FINLAND, Western Finland province, Pöytyä, Lammenrahka, 60°44'37"N; 22°25'32"E, 16.08.2018, S. Nokkala & Ch. Nokkala leg. |
| <i>C. ledi</i> | CLLMR_m4 | m | + |    | 24+X0  | FINLAND, Western Finland province, Pöytyä, Lammenrahka, 60°44'37"N; 22°25'32"E, 16.08.2018, S. Nokkala & Ch. Nokkala leg. |

|                |          |   |   |   |       |                                                                                                                           |
|----------------|----------|---|---|---|-------|---------------------------------------------------------------------------------------------------------------------------|
| <i>C. ledi</i> | CLLMR_m5 | m | + |   |       | FINLAND, Western Finland province, Pöytyä, Lammenrahka, 60°44'37"N; 22°25'32"E, 16.08.2018, S. Nokkala & Ch. Nokkala leg. |
| <i>C. ledi</i> | CLLMR_m6 | m | + |   |       | FINLAND, Western Finland province, Pöytyä, Lammenrahka, 60°44'37"N; 22°25'32"E, 16.08.2018, S. Nokkala & Ch. Nokkala leg. |
| <i>C. ledi</i> | CLKVI_m1 | m | + |   | 24+X0 | FINLAND, Western Finland province, Kustavi, 60°39'20"N; 21°18'12"E, 25.08.2019, S. Nokkala & Ch. Nokkala leg.             |
| <i>C. ledi</i> | CLKVI_m2 | m | + |   | 24+X0 | FINLAND, Western Finland province, Kustavi, 60°39'20"N; 21°18'12"E, 25.08.2019, S. Nokkala & Ch. Nokkala leg.             |
| <i>C. ledi</i> | CLKVI_m3 | m | + |   |       | FINLAND, Western Finland province, Kustavi, 60°39'20"N; 21°18'12"E, 25.08.2019, S. Nokkala & Ch. Nokkala leg.             |
| <i>C. ledi</i> | CLKVI_m4 | m | + |   |       | FINLAND, Western Finland province, Kustavi, 60°39'20"N; 21°18'12"E, 25.08.2019, S. Nokkala & Ch. Nokkala leg.             |
| <i>C. ledi</i> | CLKVI_m5 | m | + |   |       | FINLAND, Western Finland province, Kustavi, 60°39'20"N; 21°18'12"E, 25.08.2019, S. Nokkala & Ch. Nokkala leg.             |
| <i>C. ledi</i> | CLKVI_m6 | m | + |   |       | FINLAND, Western Finland province, Kustavi, 60°39'20"N; 21°18'12"E, 25.08.2019, S. Nokkala & Ch. Nokkala leg.             |
| <i>C. ledi</i> | PV_17-1  | f | + | + |       | FINLAND, Lapland province, Inari, Pitkävuono, 68°58'56"N; 26°57'18"E, 16.08.2017, S. Nokkala & Ch. Nokkala leg.           |
| <i>C. ledi</i> | CLUH_f1  | f | + | + |       | FINLAND, Lapland province, Utsjoki, Hietala 69°51'06"N; 27°00'34"E, 15.08.2017, S. Nokkala & Ch. Nokkala leg.             |
| <i>C. ledi</i> | CLUH_f2  | f | + | + |       | FINLAND, Lapland province, Utsjoki, Hietala 69°51'06"N; 27°00'34"E, 15.08.2017, S. Nokkala & Ch. Nokkala leg.             |
| <i>C. ledi</i> | CLUH_f3  | f | - | + |       | FINLAND, Lapland province, Utsjoki, Hietala 69°51'06"N; 27°00'34"E, 15.08.2012, S. Nokkala & Ch. Nokkala leg.             |
| <i>C. ledi</i> | CBST_f2  | f | + | + |       | FINLAND, Lapland province, Tuntsantie, 67°18'11"N; 29°16'18"E, 01.08.2019, S. Nokkala & Ch. Nokkala leg.                  |
| <i>C. ledi</i> | CLMJ_m1  | m | + | + | 24+X0 | NORWAY, Troms og Finnmark county, Mohkkejogas, 69°26'35"N; 25°11'36"E, 26.07.2020, S. Nokkala & Ch. Nokkala leg.          |
| <i>C. ledi</i> | CLMJ_m2  | m | + | + | 24+X0 | NORWAY, Troms og Finnmark county, Mohkkejogas, 69°26'35"N; 25°11'36"E, 26.07.2020, S. Nokkala & Ch. Nokkala leg.          |
| <i>C. ledi</i> | CLMJ_m3  | m | + | - | 24+X0 | NORWAY, Troms og Finnmark county, Mohkkejogas, 69°26'35"N; 25°11'36"E, 26.07.2020, S. Nokkala & Ch. Nokkala leg.          |
| <i>C. ledi</i> | CLMJ_m4  | m | + | + | 24+X0 | NORWAY, Troms og Finnmark county, Mohkkejogas, 69°26'35"N; 25°11'36"E, 26.07.2020, S. Nokkala & Ch. Nokkala leg.          |
| <i>C. ledi</i> | CLMJ_m5  | m | + | + | 24+X0 | NORWAY, Troms og Finnmark county, Mohkkejogas, 69°26'35"N; 25°11'36"E, 26.07.2020, S. Nokkala & Ch. Nokkala leg.          |
| <i>C. ledi</i> | CLMJ_m6  | m | + | + | 24+X0 | NORWAY, Troms og Finnmark county, Mohkkejogas, 69°26'35"N; 25°11'36"E, 26.07.2020, S. Nokkala & Ch. Nokkala leg.          |

|                |          |   |   |   |  |                                                                                                                             |
|----------------|----------|---|---|---|--|-----------------------------------------------------------------------------------------------------------------------------|
| <i>C. ledi</i> | CLKZ_f1  | f | + | - |  | RUSSIA, Karelia Republic, White Sea, vic. Kolezma vill., 64°14'46"N 35°48'49"E, 30.09.2020, V. Kuznetsova & P. Strelkov leg |
| <i>C. ledi</i> | CLKZ_f2  | f | + | + |  | RUSSIA, Karelia Republic, White Sea, vic. Kolezma vill., 64°14'46"N 35°48'49"E, 30.09.2020, V. Kuznetsova & P. Strelkov leg |
| <i>C. ledi</i> | CLKZ_f3  | f | + | + |  | RUSSIA, Karelia Republic, White Sea, vic. Kolezma vill., 64°14'46"N 35°48'49"E, 30.09.2020, V. Kuznetsova & P. Strelkov leg |
| <i>C. ledi</i> | CLKZ_f4  | f | + | + |  | RUSSIA, Karelia Republic, White Sea, vic. Kolezma vill., 64°14'46"N 35°48'49"E, 30.09.2020, V. Kuznetsova & P. Strelkov leg |
| <i>C. ledi</i> | CLKX_f5  | f | + | + |  | RUSSIA, Karelia Republic, White Sea, vic. Kolezma vill., 64°14'46"N 35°48'49"E, 30.09.2020, V. Kuznetsova & P. Strelkov leg |
| <i>C. ledi</i> | CLKZ_f6  | f | + | + |  | RUSSIA, Karelia Republic, White Sea, vic. Kolezma vill., 64°14'46"N 35°48'49"E, 30.09.2020, V. Kuznetsova & P. Strelkov leg |
| <i>C. ledi</i> | CLKZ_f7  | f | + | + |  | RUSSIA, Karelia Republic, White Sea, vic. Kolezma vill., 64°14'46"N 35°48'49"E, 30.09.2020, V. Kuznetsova & P. Strelkov leg |
| <i>C. ledi</i> | CLKZ_f8  | f | + | - |  | RUSSIA, Karelia Republic, White Sea, vic. Kolezma vill., 64°14'46"N 35°48'49"E, 30.09.2020, V. Kuznetsova & P. Strelkov leg |
| <i>C. ledi</i> | CLKZ_f9  | f | + | + |  | RUSSIA, Karelia Republic, White Sea, vic. Kolezma vill., 64°14'46"N 35°48'49"E, 30.09.2020, V. Kuznetsova & P. Strelkov leg |
| <i>C. ledi</i> | CLKZ_f10 | f | + | + |  | RUSSIA, Karelia Republic, White Sea, vic. Kolezma vill., 64°14'46"N 35°48'49"E, 30.09.2020, V. Kuznetsova & P. Strelkov leg |
| <i>C. ledi</i> | CLKZ_f11 | f | + | + |  | RUSSIA, Karelia Republic, White Sea, vic. Kolezma vill., 64°14'46"N 35°48'49"E, 30.09.2020, V. Kuznetsova & P. Strelkov leg |
| <i>C. ledi</i> | CLKZ_f12 | f | + | + |  | RUSSIA, Karelia Republic, White Sea, vic. Kolezma vill., 64°14'46"N 35°48'49"E, 30.09.2020, V. Kuznetsova & P. Strelkov leg |
| <i>C. ledi</i> | CLKZ_f13 | f | + | + |  | RUSSIA, Karelia Republic, White Sea, vic. Kolezma vill., 64°14'46"N 35°48'49"E, 30.09.2020, V. Kuznetsova & P. Strelkov leg |
| <i>C. ledi</i> | CLKZ_f14 | f | + | + |  | RUSSIA, Karelia Republic, White Sea, vic. Kolezma vill., 64°14'46"N 35°48'49"E, 30.09.2020, V. Kuznetsova & P. Strelkov leg |
| <i>C. ledi</i> | CLKZ_f15 | f | + | + |  | RUSSIA, Karelia Republic, White Sea, vic. Kolezma vill., 64°14'46"N 35°48'49"E, 30.09.2020, V. Kuznetsova & P. Strelkov leg |
| <i>C. ledi</i> | CLKZ_f16 | f | + | + |  | RUSSIA, Karelia Republic, White Sea, vic. Kolezma vill., 64°14'46"N 35°48'49"E, 30.09.2020, V. Kuznetsova & P. Strelkov leg |
| <i>C. ledi</i> | CLKZ_f17 | f | + | + |  | RUSSIA, Karelia Republic, White Sea, vic. Kolezma vill., 64°14'46"N 35°48'49"E, 30.09.2020, V. Kuznetsova & P. Strelkov leg |
| <i>C. ledi</i> | CLKZ_f18 | f | + | + |  | RUSSIA, Karelia Republic, White Sea, vic. Kolezma vill., 64°14'46"N 35°48'49"E, 30.09.2020, V. Kuznetsova & P. Strelkov leg |
| <i>C. ledi</i> | CLV_f2   | f | + | + |  | RUSSIA, Komi Republic, Vorkuta city, 67°27'34"N; 63°59'01"E, 06.08.2013, N. Kabazova & M. Mandelshtam leg.                  |



|                    |           |   |   |   |       |                                                                                                                                |
|--------------------|-----------|---|---|---|-------|--------------------------------------------------------------------------------------------------------------------------------|
| <i>C. ledi</i>     | CLV_f3    | f | + | + |       | RUSSIA, Komi Republic, Vorkuta city, 67°27'34"N; 63°59'01"E, 06.08.2013, N. Kabazova & M. Mandelshtam leg.                     |
| <i>C. ledi</i>     | CLV_f4    | f | + | + |       | RUSSIA, Komi Republic, Vorkuta city, 67°27'34"N; 63°59'01"E, 06.08.2013, N. Kabazova & M. Mandelshtam leg.                     |
| <i>C. ledi</i>     | CLV_f5    | f | + | + |       | RUSSIA, Komi Republic, Vorkuta city, 67°27'34"N; 63°59'01"E, 06.08.2013, N. Kabazova & M. Mandelshtam leg.                     |
| <i>C. ledi</i>     | CLV_f6    | f | + | + |       | RUSSIA, Komi Republic, Vorkuta city, 67°27'34"N; 63°59'01"E, 06.08.2013, N. Kabazova & M. Mandelshtam leg.                     |
| <i>C. ledi</i>     | CLV_f7    | f | + | + |       | RUSSIA, Komi Republic, Vorkuta city, 67°27'34"N; 63°59'01"E, 06.08.2013, N. Kabazova & M. Mandelshtam leg.                     |
| <i>C. ledi</i>     | CLV_f8    | f | + | + |       | RUSSIA, Komi Republic, Vorkuta city, 67°27'34"N; 63°59'01"E, 06.08.2013, N. Kabazova & M. Mandelshtam leg.                     |
| <i>C. ledi</i>     | CLV_f9    | f | + | + |       | RUSSIA, Komi Republic, Vorkuta city, 67°27'34"N; 63°59'01"E, 06.08.2013, N. Kabazova & M. Mandelshtam leg.                     |
| <i>C. ledi</i>     | CLV_f10   | f | + | + |       | RUSSIA, Komi Republic, Vorkuta city, 67°27'34"N; 63°59'01"E, 06.08.2013, N. Kabazova & M. Mandelshtam leg.                     |
| <i>C. ledi</i>     | CLV_f12   | f | + | + |       | RUSSIA, Komi Republic, Vorkuta city, 67°27'34"N; 63°59'01"E, 06.08.2013, N. Kabazova & M. Mandelshtam leg.                     |
| <i>C. myrtilli</i> | CMPAL_m16 | m | + | + | 24+X0 | FINLAND, Kainuu province, Paltamo district, S of Törmänmäki, 64°33'28"N; 27°43'41"E, 16.07.2009, S. Nokkala & Ch. Nokkala leg. |
| <i>C. myrtilli</i> | CMPAL_f1  | f | + | + |       | FINLAND, Kainuu province, Paltamo district, S of Törmänmäki, 64°33'28"N; 27°43'41"E, 16.07.2009, S. Nokkala & Ch. Nokkala leg. |
| <i>C. myrtilli</i> | CMPAL_f2  | f | - | - |       | FINLAND, Kainuu province, Paltamo district, S of Törmänmäki, 64°33'28"N; 27°43'41"E, 16.07.2009, S. Nokkala & Ch. Nokkala leg. |
| <i>C. myrtilli</i> | CMPAL_f3  | f | - | - |       | FINLAND, Kainuu province, Paltamo district, S of Törmänmäki, 64°33'28"N; 27°43'41"E, 16.07.2009, S. Nokkala & Ch. Nokkala leg. |
| <i>C. myrtilli</i> | CMPAL_f4  | f | - | - |       | FINLAND, Kainuu province, Paltamo district, S of Törmänmäki, 64°33'28"N; 27°43'41"E, 16.07.2009, S. Nokkala & Ch. Nokkala leg. |
| <i>C. myrtilli</i> | CMPAL_f5  | f | + | + |       | FINLAND, Kainuu province, Paltamo district, S of Törmänmäki, 64°33'28"N; 27°43'41"E, 16.07.2009, S. Nokkala & Ch. Nokkala leg. |
| <i>C. myrtilli</i> | CMPAL_f6  | f | + | + |       | FINLAND, Kainuu province, Paltamo district, S of Törmänmäki, 64°33'28"N; 27°43'41"E, 16.07.2009, S. Nokkala & Ch. Nokkala leg. |
| <i>C. myrtilli</i> | CMPAL_f7  | f | - | - |       | FINLAND, Kainuu province, Paltamo district, S of Törmänmäki, 64°33'28"N; 27°43'41"E, 16.07.2009, S. Nokkala & Ch. Nokkala leg. |
| <i>C. myrtilli</i> | CMPAL_f8  | f | - | - |       | FINLAND, Kainuu province, Paltamo district, S of Törmänmäki, 64°33'28"N; 27°43'41"E, 16.07.2009, S. Nokkala & Ch. Nokkala leg. |
| <i>C. myrtilli</i> | CMPAL_f9  | f | + | + |       | FINLAND, Kainuu province, Paltamo district, S of Törmänmäki, 64°33'28"N; 27°43'41"E, 16.07.2009, S. Nokkala & Ch. Nokkala leg. |

|                    |           |   |   |   |       |                                                                                                                                |
|--------------------|-----------|---|---|---|-------|--------------------------------------------------------------------------------------------------------------------------------|
| <i>C. myrtilli</i> | CMPAL_f10 | f | + | + |       | FINLAND, Kainuu province, Paltamo district, S of Törmänmäki, 64°33'28"N; 27°43'41"E, 16.07.2009, S. Nokkala & Ch. Nokkala leg. |
| <i>C. myrtilli</i> | CMPAL_f11 | f | - | - |       | FINLAND, Kainuu province, Paltamo district, S of Törmänmäki, 64°33'28"N; 27°43'41"E, 16.07.2009, S. Nokkala & Ch. Nokkala leg. |
| <i>C. myrtilli</i> | CMPAL_f12 | f | + | + |       | FINLAND, Kainuu province, Paltamo district, S of Törmänmäki, 64°33'28"N; 27°43'41"E, 16.07.2009, S. Nokkala & Ch. Nokkala leg. |
| <i>C. myrtilli</i> | CMUA_m3   | m | - | - | 24+X0 | FINLAND, Lapland province, Utsjoki, Ailigas, 69°53'51"N; 27°03'32"E, 16.08.2017, S. Nokkala & Ch. Nokkala leg.                 |
| <i>C. myrtilli</i> | CMUA_f15  | f | - | - |       | FINLAND, Lapland province, Utsjoki, Ailigas, 69°53'51"N; 27°03'32"E, 16.08.2017, S. Nokkala & Ch. Nokkala leg.                 |
| <i>C. myrtilli</i> | CMUA_f16  | f | + | - |       | FINLAND, Lapland province, Utsjoki, Ailigas, 69°53'51"N; 27°03'32"E, 16.08.2017, S. Nokkala & Ch. Nokkala leg.                 |
| <i>C. myrtilli</i> | CMUA_f17  | f | + | - |       | FINLAND, Lapland province, Utsjoki, Ailigas, 69°53'51"N; 27°03'32"E, 16.08.2017, S. Nokkala & Ch. Nokkala leg.                 |
| <i>C. myrtilli</i> | CMUA_f18  | f | - | - |       | FINLAND, Lapland province, Utsjoki, Ailigas, 69°53'51"N; 27°03'32"E, 16.08.2017, S. Nokkala & Ch. Nokkala leg.                 |
| <i>C. myrtilli</i> | CMUA_f19  | f | - | - |       | FINLAND, Lapland province, Utsjoki, Ailigas, 69°53'51"N; 27°03'32"E, 16.08.2017, S. Nokkala & Ch. Nokkala leg.                 |
| <i>C. myrtilli</i> | CMUA_f20  | f | - | - |       | FINLAND, Lapland province, Utsjoki, Ailigas, 69°53'51"N; 27°03'32"E, 16.08.2017, S. Nokkala & Ch. Nokkala leg.                 |
| <i>C. myrtilli</i> | CMUA_f21  | f | - | - |       | FINLAND, Lapland province, Utsjoki, Ailigas, 69°53'51"N; 27°03'32"E, 16.08.2017, S. Nokkala & Ch. Nokkala leg.                 |
| <i>C. myrtilli</i> | CMUA_f22  | f | - | - |       | FINLAND, Lapland province, Utsjoki, Ailigas, 69°53'51"N; 27°03'32"E, 16.08.2017, S. Nokkala & Ch. Nokkala leg.                 |
| <i>C. myrtilli</i> | CMUA_f23  | f | - | - |       | FINLAND, Lapland province, Utsjoki, Ailigas, 69°53'51"N; 27°03'32"E, 16.08.2017, S. Nokkala & Ch. Nokkala leg.                 |
| <i>C. myrtilli</i> | CMUA_f24  | f | - | - |       | FINLAND, Lapland province, Utsjoki, Ailigas, 69°53'51"N; 27°03'32"E, 16.08.2017, S. Nokkala & Ch. Nokkala leg.                 |
| <i>C. myrtilli</i> | CMUA_f25  | f | - | - |       | FINLAND, Lapland province, Utsjoki, Ailigas, 69°53'51"N; 27°03'32"E, 16.08.2017, S. Nokkala & Ch. Nokkala leg.                 |
| <i>C. myrtilli</i> | CMUA_f26  | f | - | - |       | FINLAND, Lapland province, Utsjoki, Ailigas, 69°53'51"N; 27°03'32"E, 16.08.2017, S. Nokkala & Ch. Nokkala leg.                 |
| <i>C. myrtilli</i> | CMUA_f27  | f | + | + |       | FINLAND, Lapland province, Utsjoki, Ailigas, 69°53'51"N; 27°03'32"E, 16.08.2017, S. Nokkala & Ch. Nokkala leg.                 |
| <i>C. myrtilli</i> | CMUA_f28  | f | - | - |       | FINLAND, Lapland province, Utsjoki, Ailigas, 69°53'51"N; 27°03'32"E, 16.08.2017, S. Nokkala & Ch. Nokkala leg.                 |
| <i>C. myrtilli</i> | CMUH_f7   | f | - | - |       | FINLAND, Lapland province, Utsjoki, Hietala 69°51'06"N; 27°00'34"E, 11.08.2012, S. Nokkala & Ch. Nokkala leg.                  |

|                    |          |   |   |      |                                                                                                                     |
|--------------------|----------|---|---|------|---------------------------------------------------------------------------------------------------------------------|
| <i>C. myrtilli</i> | CMUH_f8  | f | - | -    | FINLAND, Lapland province, Utsjoki, Hietala 69°51'06"N; 27°00'34"E, 11.08.2012, S. Nokkala & Ch. Nokkala leg.       |
| <i>C. myrtilli</i> | CMUH_f9  | f | - | -    | FINLAND, Lapland province, Utsjoki, Hietala 69°51'06"N; 27°00'34"E, 11.08.2012, S. Nokkala & Ch. Nokkala leg.       |
| <i>C. myrtilli</i> | CMUH_f10 | f | + | +    | FINLAND, Lapland province, Utsjoki, Hietala 69°51'06"N; 27°00'34"E, 11.08.2012, S. Nokkala & Ch. Nokkala leg.       |
| <i>C. myrtilli</i> | CMUH_f11 | f | - | -    | FINLAND, Lapland province, Utsjoki, Hietala 69°51'06"N; 27°00'34"E, 11.08.2012, S. Nokkala & Ch. Nokkala leg.       |
| <i>C. myrtilli</i> | CMUH_f12 | f | - | -    | FINLAND, Lapland province, Utsjoki, Hietala 69°51'06"N; 27°00'34"E, 11.08.2012, S. Nokkala & Ch. Nokkala leg.       |
| <i>C. myrtilli</i> | CMUH_f13 | f | + | -    | FINLAND, Lapland province, Utsjoki, Hietala 69°51'06"N; 27°00'34"E, 11.08.2012, S. Nokkala & Ch. Nokkala leg.       |
| <i>C. myrtilli</i> | CMUH_f14 | f | + | -    | FINLAND, Lapland province, Utsjoki, Hietala 69°51'06"N; 27°00'34"E, 11.08.2012, S. Nokkala & Ch. Nokkala leg.       |
| <i>C. myrtilli</i> | CMUH_f15 | f | + | -    | FINLAND, Lapland province, Utsjoki, Hietala 69°51'06"N; 27°00'34"E, 11.08.2012, S. Nokkala & Ch. Nokkala leg.       |
| <i>C. myrtilli</i> | CMUH_f16 | f | - | -    | FINLAND, Lapland province, Utsjoki, Hietala 69°51'06"N; 27°00'34"E, 11.08.2012, S. Nokkala & Ch. Nokkala leg.       |
| <i>C. myrtilli</i> | CMUH_f17 | f | + | -    | FINLAND, Lapland province, Utsjoki, Hietala 69°51'06"N; 27°00'34"E, 11.08.2012, S. Nokkala & Ch. Nokkala leg.       |
| <i>C. myrtilli</i> | CMUH_f18 | f | + | -    | FINLAND, Lapland province, Utsjoki, Hietala 69°51'06"N; 27°00'34"E, 11.08.2012, S. Nokkala & Ch. Nokkala leg.       |
| <i>C. myrtilli</i> | CMPS_f7  | f | - | n\ a | FINLAND, Lapland province, Sodankylä, Puisuvanto, 67°46'52"N; 26°46'09"E, 03.08.2018, S. Nokkala & Ch. Nokkala leg. |
| <i>C. myrtilli</i> | CMPS_f8  | f | - | n\ a | FINLAND, Lapland province, Sodankylä, Puisuvanto, 67°46'52"N; 26°46'09"E, 03.08.2018, S. Nokkala & Ch. Nokkala leg. |
| <i>C. myrtilli</i> | CMPS_f9  | f | - | n\ a | FINLAND, Lapland province, Sodankylä, Puisuvanto, 67°46'52"N; 26°46'09"E, 03.08.2018, S. Nokkala & Ch. Nokkala leg. |
| <i>C. myrtilli</i> | CMPS_f10 | f | + | n\ a | FINLAND, Lapland province, Sodankylä, Puisuvanto, 67°46'52"N; 26°46'09"E, 03.08.2018, S. Nokkala & Ch. Nokkala leg. |
| <i>C. myrtilli</i> | CMPS_f11 | f | + | n\ a | FINLAND, Lapland province, Sodankylä, Puisuvanto, 67°46'52"N; 26°46'09"E, 03.08.2018, S. Nokkala & Ch. Nokkala leg. |
| <i>C. myrtilli</i> | CMPS_f12 | f | + | n\ a | FINLAND, Lapland province, Sodankylä, Puisuvanto, 67°46'52"N; 26°46'09"E, 03.08.2018, S. Nokkala & Ch. Nokkala leg. |
| <i>C. myrtilli</i> | CMPS_f13 | f | - | n\ a | FINLAND, Lapland province, Sodankylä, Puisuvanto, 67°46'52"N; 26°46'09"E, 03.08.2018, S. Nokkala & Ch. Nokkala leg. |
| <i>C. myrtilli</i> | CMPS_f14 | f | - | n\ a | FINLAND, Lapland province, Sodankylä, Puisuvanto, 67°46'52"N; 26°46'09"E, 03.08.2018, S. Nokkala & Ch. Nokkala leg. |

|                    |          |   |   |    |                                                                                                                     |
|--------------------|----------|---|---|----|---------------------------------------------------------------------------------------------------------------------|
| <i>C. myrtilli</i> | CMPS_f15 | f | + | n\ | FINLAND, Lapland province, Sodankylä, Puisuvanto, 67°46'52"N; 26°46'09"E, 03.08.2018, S. Nokkala & Ch. Nokkala leg. |
| <i>C. myrtilli</i> | CMPS_f16 | f | + | n\ | FINLAND, Lapland province, Sodankylä, Puisuvanto, 67°46'52"N; 26°46'09"E, 03.08.2018, S. Nokkala & Ch. Nokkala leg. |
| <i>C. myrtilli</i> | CMPS_f17 | f | + | n\ | FINLAND, Lapland province, Sodankylä, Puisuvanto, 67°46'52"N; 26°46'09"E, 03.08.2018, S. Nokkala & Ch. Nokkala leg. |
| <i>C. myrtilli</i> | CMPS_f18 | f | + | n\ | FINLAND, Lapland province, Sodankylä, Puisuvanto, 67°46'52"N; 26°46'09"E, 03.08.2018, S. Nokkala & Ch. Nokkala leg. |
| <i>C. myrtilli</i> | CMLI_f17 | f | - | -  | FINLAND, Olulu province, Liminka, 64°43'53"N; 25°23'04"E, 04.08.2009, S. Nokkala & Ch. Nokkala leg.                 |
| <i>C. myrtilli</i> | CMLI_f18 | f | - | -  | FINLAND, Olulu province, Liminka, 64°43'53"N; 25°23'04"E, 04.08.2009, S. Nokkala & Ch. Nokkala leg.                 |
| <i>C. myrtilli</i> | CMLI_f19 | f | + | +  | FINLAND, Olulu province, Liminka, 64°43'53"N; 25°23'04"E, 04.08.2009, S. Nokkala & Ch. Nokkala leg.                 |
| <i>C. myrtilli</i> | CMLI_f20 | f | - | -  | FINLAND, Olulu province, Liminka, 64°43'53"N; 25°23'04"E, 04.08.2009, S. Nokkala & Ch. Nokkala leg.                 |
| <i>C. myrtilli</i> | CMLI_f21 | f | + | +  | FINLAND, Olulu province, Liminka, 64°43'53"N; 25°23'04"E, 04.08.2009, S. Nokkala & Ch. Nokkala leg.                 |
| <i>C. myrtilli</i> | CMLI_f22 | f | - | -  | FINLAND, Olulu province, Liminka, 64°43'53"N; 25°23'04"E, 04.08.2009, S. Nokkala & Ch. Nokkala leg.                 |
| <i>C. myrtilli</i> | CMLI_f23 | f | - | -  | FINLAND, Olulu province, Liminka, 64°43'53"N; 25°23'04"E, 04.08.2009, S. Nokkala & Ch. Nokkala leg.                 |
| <i>C. myrtilli</i> | CMLI_f24 | f | - | -  | FINLAND, Olulu province, Liminka, 64°43'53"N; 25°23'04"E, 04.08.2009, S. Nokkala & Ch. Nokkala leg.                 |
| <i>C. myrtilli</i> | CMLI_f25 | f | + | +  | FINLAND, Olulu province, Liminka, 64°43'53"N; 25°23'04"E, 04.08.2009, S. Nokkala & Ch. Nokkala leg.                 |
| <i>C. myrtilli</i> | CMLI_f26 | f | - | -  | FINLAND, Olulu province, Liminka, 64°43'53"N; 25°23'04"E, 04.08.2009, S. Nokkala & Ch. Nokkala leg.                 |
| <i>C. myrtilli</i> | CMLI_f27 | f | + | +  | FINLAND, Olulu province, Liminka, 64°43'53"N; 25°23'04"E, 04.08.2009, S. Nokkala & Ch. Nokkala leg.                 |
| <i>C. myrtilli</i> | CNLI_f28 | f | - | -  | FINLAND, Olulu province, Liminka, 64°43'53"N; 25°23'04"E, 04.08.2009, S. Nokkala & Ch. Nokkala leg.                 |
| <i>C. myrtilli</i> | CMT_f10  | f | + | n\ | FINLAND, Eastern Finland province, Tohmajärvi, 62°23'12"N; 30°19'46"E, 12.08.2012, S. Nokkala & Ch. Nokkala leg.    |
| <i>C. myrtilli</i> | CMT_f11  | f | + | n\ | FINLAND, Eastern Finland province, Tohmajärvi, 62°23'12"N; 30°19'46"E, 12.08.2012, S. Nokkala & Ch. Nokkala leg.    |
| <i>C. myrtilli</i> | CMT_f12  | f | + | n\ | FINLAND, Eastern Finland province, Tohmajärvi, 62°23'12"N; 30°19'46"E, 12.08.2012, S. Nokkala & Ch. Nokkala leg.    |

|                    |           |   |   |      |  |                                                                                                                                   |
|--------------------|-----------|---|---|------|--|-----------------------------------------------------------------------------------------------------------------------------------|
| <i>C. myrtilli</i> | CMT_fl3   | f | + | n\ a |  | FINLAND, Eastern Finland province, Tohmajärvi, 62°23'12"N; 30°19'46"E, 12.08.2012, S. Nokkala & Ch. Nokkala leg.                  |
| <i>C. myrtilli</i> | CMT_fl4   | f | + | n\ a |  | FINLAND, Eastern Finland province, Tohmajärvi, 62°23'12"N; 30°19'46"E, 12.08.2012, S. Nokkala & Ch. Nokkala leg.                  |
| <i>C. myrtilli</i> | CMT_fl5   | f | + | n\ a |  | FINLAND, Eastern Finland province, Tohmajärvi, 62°23'12"N; 30°19'46"E, 12.08.2012, S. Nokkala & Ch. Nokkala leg.                  |
| <i>C. myrtilli</i> | CMT_fl6   | f | + | n\ a |  | FINLAND, Eastern Finland province, Tohmajärvi, 62°23'12"N; 30°19'46"E, 12.08.2012, S. Nokkala & Ch. Nokkala leg.                  |
| <i>C. myrtilli</i> | CMT_fl7   | f | + | n\ a |  | FINLAND, Eastern Finland province, Tohmajärvi, 62°23'12"N; 30°19'46"E, 12.08.2012, S. Nokkala & Ch. Nokkala leg.                  |
| <i>C. myrtilli</i> | CMT_fl8   | f | + | n\ a |  | FINLAND, Eastern Finland province, Tohmajärvi, 62°23'12"N; 30°19'46"E, 12.08.2012, S. Nokkala & Ch. Nokkala leg.                  |
| <i>C. myrtilli</i> | CMAB_f1   | f | + | +    |  | SWEDEN, Swedish Lapland province, Abisko, Lapporten, 68°19'14"N; 18°51'05"E, h = 570 m, 26.07.2014, S. Nokkala & Ch. Nokkala leg. |
| <i>C. myrtilli</i> | CMAB_f2   | f | + | +    |  | SWEDEN, Swedish Lapland province, Abisko, Lapporten, 68°19'14"N; 18°51'05"E, h = 570 m, 26.07.2014, S. Nokkala & Ch. Nokkala leg. |
| <i>C. myrtilli</i> | CMAB_f3   | f | + | +    |  | SWEDEN, Swedish Lapland province, Abisko, Lapporten, 68°19'14"N; 18°51'05"E, h = 570 m, 26.07.2014, S. Nokkala & Ch. Nokkala leg. |
| <i>C. myrtilli</i> | CMAB_f4   | f | - | -    |  | SWEDEN, Swedish Lapland province, Abisko, Lapporten, 68°19'14"N; 18°51'05"E, h = 570 m, 26.07.2014, S. Nokkala & Ch. Nokkala leg. |
| <i>C. myrtilli</i> | CMAB_f5   | f | + | +    |  | SWEDEN, Swedish Lapland province, Abisko, Lapporten, 68°19'14"N; 18°51'05"E, h = 570 m, 26.07.2014, S. Nokkala & Ch. Nokkala leg. |
| <i>C. myrtilli</i> | CMAB_f6   | f | + | +    |  | SWEDEN, Swedish Lapland province, Abisko, Lapporten, 68°19'14"N; 18°51'05"E, h = 570 m, 26.07.2014, S. Nokkala & Ch. Nokkala leg. |
| <i>C. myrtilli</i> | CMAB_f7   | f | + | +    |  | SWEDEN, Swedish Lapland province, Abisko, Lapporten, 68°19'14"N; 18°51'05"E, h = 570 m, 26.07.2014, S. Nokkala & Ch. Nokkala leg. |
| <i>C. myrtilli</i> | CMAB_f8   | f | + | +    |  | SWEDEN, Swedish Lapland province, Abisko, Lapporten, 68°19'14"N; 18°51'05"E, h = 570 m, 26.07.2014, S. Nokkala & Ch. Nokkala leg. |
| <i>C. myrtilli</i> | CMAB_f9   | f | + | +    |  | SWEDEN, Swedish Lapland province, Abisko, Lapporten, 68°19'14"N; 18°51'05"E, h = 570 m, 26.07.2014, S. Nokkala & Ch. Nokkala leg. |
| <i>C. myrtilli</i> | CMAB_f10  | f | + | -    |  | SWEDEN, Swedish Lapland province, Abisko, Lapporten, 68°19'14"N; 18°51'05"E, h = 570 m, 26.07.2014, S. Nokkala & Ch. Nokkala leg. |
| <i>C. myrtilli</i> | CMAB_f11  | f | + | +    |  | SWEDEN, Swedish Lapland province, Abisko, Lapporten, 68°19'14"N; 18°51'05"E, h = 570 m, 26.07.2014, S. Nokkala & Ch. Nokkala leg. |
| <i>C. myrtilli</i> | CMAB_f12  | f | + | +    |  | SWEDEN, Swedish Lapland province, Abisko, Lapporten, 68°19'14"N; 18°51'05"E, h = 570 m, 26.07.2014, S. Nokkala & Ch. Nokkala leg. |
| <i>C. myrtilli</i> | CMBF_fl13 | f | - | -    |  | SWEDEN, Swedish Lapland province, Björkliden, Fjället, 68°24'32"N; 18°39'55"E, 03.08.2009, S. Nokkala & Ch. Nokkala leg.          |

|                    |          |   |      |   |                                                                                                                          |
|--------------------|----------|---|------|---|--------------------------------------------------------------------------------------------------------------------------|
| <i>C. myrtilli</i> | CMBF_f14 | f | -    | - | SWEDEN, Swedish Lapland province, Björkliden, Fjället, 68°24'32"N; 18°39'55"E, 03.08.2009, S. Nokkala & Ch. Nokkala leg. |
| <i>C. myrtilli</i> | CMBF_f15 | f | -    | - | SWEDEN, Swedish Lapland province, Björkliden, Fjället, 68°24'32"N; 18°39'55"E, 03.08.2009, S. Nokkala & Ch. Nokkala leg. |
| <i>C. myrtilli</i> | CMBF_f16 | f | -    | - | SWEDEN, Swedish Lapland province, Björkliden, Fjället, 68°24'32"N; 18°39'55"E, 03.08.2009, S. Nokkala & Ch. Nokkala leg. |
| <i>C. myrtilli</i> | CMBF_f17 | f | -    | - | SWEDEN, Swedish Lapland province, Björkliden, Fjället, 68°24'32"N; 18°39'55"E, 03.08.2009, S. Nokkala & Ch. Nokkala leg. |
| <i>C. myrtilli</i> | CMBF_f18 | f | -    | - | SWEDEN, Swedish Lapland province, Björkliden, Fjället, 68°24'32"N; 18°39'55"E, 03.08.2009, S. Nokkala & Ch. Nokkala leg. |
| <i>C. myrtilli</i> | CMBF_f19 | f | -    | - | SWEDEN, Swedish Lapland province, Björkliden, Fjället, 68°24'32"N; 18°39'55"E, 03.08.2009, S. Nokkala & Ch. Nokkala leg. |
| <i>C. myrtilli</i> | CMBF_f20 | f | -    | - | SWEDEN, Swedish Lapland province, Björkliden, Fjället, 68°24'32"N; 18°39'55"E, 03.08.2009, S. Nokkala & Ch. Nokkala leg. |
| <i>C. myrtilli</i> | CMBF_f21 | f | -    | - | SWEDEN, Swedish Lapland province, Björkliden, Fjället, 68°24'32"N; 18°39'55"E, 03.08.2009, S. Nokkala & Ch. Nokkala leg. |
| <i>C. myrtilli</i> | CMBF_f22 | f | -    | - | SWEDEN, Swedish Lapland province, Björkliden, Fjället, 68°24'32"N; 18°39'55"E, 03.08.2009, S. Nokkala & Ch. Nokkala leg. |
| <i>C. myrtilli</i> | CMBF_f23 | f | -    | - | SWEDEN, Swedish Lapland province, Björkliden, Fjället, 68°24'32"N; 18°39'55"E, 03.08.2009, S. Nokkala & Ch. Nokkala leg. |
| <i>C. myrtilli</i> | CMBF_f24 | f | -    | - | SWEDEN, Swedish Lapland province, Björkliden, Fjället, 68°24'32"N; 18°39'55"E, 03.08.2009, S. Nokkala & Ch. Nokkala leg. |
| <i>C. myrtilli</i> | CMSO_f7  | f | n\ a | - | SWEDEN, Norbothnia province, Soppero, 68°00'39"N; 21°39'25"E, 10.08.2012, S. Nokkala & Ch. Nokkala leg.                  |
| <i>C. myrtilli</i> | CMSO_f8  | f | n\ a | - | SWEDEN, Norbothnia province, Soppero, 68°00'39"N; 21°39'25"E, 10.08.2012, S. Nokkala & Ch. Nokkala leg.                  |
| <i>C. myrtilli</i> | CMSO_f9  | f | n\ a | - | SWEDEN, Norbothnia province, Soppero, 68°00'39"N; 21°39'25"E, 10.08.2012, S. Nokkala & Ch. Nokkala leg.                  |
| <i>C. myrtilli</i> | CMSO_f10 | f | n\ a | - | SWEDEN, Norbothnia province, Soppero, 68°00'39"N; 21°39'25"E, 10.08.2012, S. Nokkala & Ch. Nokkala leg.                  |
| <i>C. myrtilli</i> | CMSO_f11 | f | n\ a | - | SWEDEN, Norbothnia province, Soppero, 68°00'39"N; 21°39'25"E, 10.08.2012, S. Nokkala & Ch. Nokkala leg.                  |
| <i>C. myrtilli</i> | CMSO_f12 | f | n\ a | - | SWEDEN, Norbothnia province, Soppero, 68°00'39"N; 21°39'25"E, 10.08.2012, S. Nokkala & Ch. Nokkala leg.                  |
| <i>C. myrtilli</i> | CMSO_f16 | f | -    | - | SWEDEN, Norbothnia province, Soppero, 68°00'39"N; 21°39'25"E, 10.08.2012, S. Nokkala & Ch. Nokkala leg.                  |
| <i>C. myrtilli</i> | CMSO_f17 | f | -    | - | SWEDEN, Norbothnia province, Soppero, 68°00'39"N; 21°39'25"E, 10.08.2012, S. Nokkala & Ch. Nokkala leg.                  |

|                    |           |   |   |    |                                                                                                            |
|--------------------|-----------|---|---|----|------------------------------------------------------------------------------------------------------------|
| <i>C. myrtilli</i> | CMSO_f18  | f | - | -  | SWEDEN, Norbothnia province, Soppero, 68°00'39"N; 21°39'25"E, 10.08.2012, S. Nokkala & Ch. Nokkala leg.    |
| <i>C. myrtilli</i> | CMSO_f19  | f | - | -  | SWEDEN, Norbothnia province, Soppero, 68°00'39"N; 21°39'25"E, 10.08.2012, S. Nokkala & Ch. Nokkala leg.    |
| <i>C. myrtilli</i> | CMSO_f20  | f | - | -  | SWEDEN, Norbothnia province, Soppero, 68°00'39"N; 21°39'25"E, 10.08.2012, S. Nokkala & Ch. Nokkala leg.    |
| <i>C. myrtilli</i> | CMSO_f21  | f | - | -  | SWEDEN, Norbothnia province, Soppero, 68°00'39"N; 21°39'25"E, 10.08.2012, S. Nokkala & Ch. Nokkala leg.    |
| <i>C. myrtilli</i> | CMJO_f9   | f | - | n\ | SWEDEN, Norbothnia province, Jokkmok, 66°35'36"N; 19°49'20"E, 08.08.2012, S. Nokkala & Ch. Nokkala leg.    |
| <i>C. myrtilli</i> | CMJO_f10  | f | - | n\ | SWEDEN, Norbothnia province, Jokkmok, 66°35'36"N; 19°49'20"E, 08.08.2012, S. Nokkala & Ch. Nokkala leg.    |
| <i>C. myrtilli</i> | CMJO_f11  | f | - | n\ | SWEDEN, Norbothnia province, Jokkmok, 66°35'36"N; 19°49'20"E, 08.08.2012, S. Nokkala & Ch. Nokkala leg.    |
| <i>C. myrtilli</i> | CMJO_f12  | f | - | n\ | SWEDEN, Norbothnia province, Jokkmok, 66°35'36"N; 19°49'20"E, 08.08.2012, S. Nokkala & Ch. Nokkala leg.    |
| <i>C. myrtilli</i> | CMJO_f13  | f | - | n\ | SWEDEN, Norbothnia province, Jokkmok, 66°35'36"N; 19°49'20"E, 08.08.2012, S. Nokkala & Ch. Nokkala leg.    |
| <i>C. myrtilli</i> | CMJO_f14  | f | + | n\ | SWEDEN, Norbothnia province, Jokkmok, 66°35'36"N; 19°49'20"E, 08.08.2012, S. Nokkala & Ch. Nokkala leg.    |
| <i>C. myrtilli</i> | CMJO_f21  | f | - | -  | SWEDEN, Norbothnia province, Jokkmok, 66°35'36"N; 19°49'20"E, 08.08.2012, S. Nokkala & Ch. Nokkala leg.    |
| <i>C. myrtilli</i> | CMJO_f22  | f | + | +  | SWEDEN, Norbothnia province, Jokkmok, 66°35'36"N; 19°49'20"E, 08.08.2012, S. Nokkala & Ch. Nokkala leg.    |
| <i>C. myrtilli</i> | CMJO_f23  | f | - | -  | SWEDEN, Norbothnia province, Jokkmok, 66°35'36"N; 19°49'20"E, 08.08.2012, S. Nokkala & Ch. Nokkala leg.    |
| <i>C. myrtilli</i> | CMJO_f24  | f | - | -  | SWEDEN, Norbothnia province, Jokkmok, 66°35'36"N; 19°49'20"E, 08.08.2012, S. Nokkala & Ch. Nokkala leg.    |
| <i>C. myrtilli</i> | CMJO_f25  | f | - | -  | SWEDEN, Norbothnia province, Jokkmok, 66°35'36"N; 19°49'20"E, 08.08.2012, S. Nokkala & Ch. Nokkala leg.    |
| <i>C. myrtilli</i> | CMJO_f26  | f | - | -  | SWEDEN, Norbothnia province, Jokkmok, 66°35'36"N; 19°49'20"E, 08.08.2012, S. Nokkala & Ch. Nokkala leg.    |
| <i>C. myrtilli</i> | CMSS17_f1 | f | + | n\ | SWEDEN, Westrobothnia province, Sorsele, 65°29'07"N; 17°33'36"E, 17.08.2010, S. Nokkala & Ch. Nokkala leg. |
| <i>C. myrtilli</i> | CMSS17_f2 | f | + | n\ | SWEDEN, Westrobothnia province, Sorsele, 65°29'07"N; 17°33'36"E, 17.08.2010, S. Nokkala & Ch. Nokkala leg. |
| <i>C. myrtilli</i> | CMSS17_f3 | f | - | n\ | SWEDEN, Westrobothnia province, Sorsele, 65°29'07"N; 17°33'36"E, 17.08.2010, S. Nokkala & Ch. Nokkala leg. |

|                    |            |   |    |    |  |                                                                                                             |
|--------------------|------------|---|----|----|--|-------------------------------------------------------------------------------------------------------------|
| <i>C. myrtilli</i> | CMSS17_f4  | f | -  | n\ |  | SWEDEN, Westrobothnia province, Sorsele, 65°29'07"N; 17°33'36"E, 17.08.2010, S. Nokkala & Ch. Nokkala leg.  |
| <i>C. myrtilli</i> | CMSS17_f5  | f | -  | n\ |  | SWEDEN, Westrobothnia province, Sorsele, 65°29'07"N; 17°33'36"E, 17.08.2010, S. Nokkala & Ch. Nokkala leg.  |
| <i>C. myrtilli</i> | CMSS17_f6  | f | +  | n\ |  | SWEDEN, Westrobothnia province, Sorsele, 65°29'07"N; 17°33'36"E, 17.08.2010, S. Nokkala & Ch. Nokkala leg.  |
| <i>C. myrtilli</i> | CMSS17_f22 | f | -  | -  |  | SWEDEN, Westrobothnia province, Sorsele, 65°29'07"N; 17°33'36"E, 17.08.2010, S. Nokkala & Ch. Nokkala leg.  |
| <i>C. myrtilli</i> | CMSS17_f23 | f | +  | +  |  | SWEDEN, Westrobothnia province, Sorsele, 65°29'07"N; 17°33'36"E, 17.08.2010, S. Nokkala & Ch. Nokkala leg.  |
| <i>C. myrtilli</i> | CMSS17_f24 | f | +  | +  |  | SWEDEN, Westrobothnia province, Sorsele, 65°29'07"N; 17°33'36"E, 17.08.2010, S. Nokkala & Ch. Nokkala leg.  |
| <i>C. myrtilli</i> | CMSS17_f25 | f | +  | +  |  | SWEDEN, Westrobothnia province, Sorsele, 65°29'07"N; 17°33'36"E, 17.08.2010, S. Nokkala & Ch. Nokkala leg.  |
| <i>C. myrtilli</i> | CMSS17_f26 | f | +  | +  |  | SWEDEN, Westrobothnia province, Sorsele, 65°29'07"N; 17°33'36"E, 17.08.2010, S. Nokkala & Ch. Nokkala leg.  |
| <i>C. myrtilli</i> | CMSS17_f27 | f | -  | -  |  | SWEDEN, Westrobothnia province, Sorsele, 65°29'07"N; 17°33'36"E, 17.08.2010, S. Nokkala & Ch. Nokkala leg.  |
| <i>C. myrtilli</i> | CMST_f6    | f | n\ | -  |  | SWEDEN, Westrobothnia province, Storuman, 65°05'16"N; 17°06'51"E, 08.08.2012, S. Nokkala & Ch. Nokkala leg. |
| <i>C. myrtilli</i> | CMST_f7    | f | n\ | -  |  | SWEDEN, Westrobothnia province, Storuman, 65°05'16"N; 17°06'51"E, 08.08.2012, S. Nokkala & Ch. Nokkala leg. |
| <i>C. myrtilli</i> | CMST_f8    | f | n\ | +  |  | SWEDEN, Westrobothnia province, Storuman, 65°05'16"N; 17°06'51"E, 08.08.2012, S. Nokkala & Ch. Nokkala leg. |
| <i>C. myrtilli</i> | CMST_f9    | f | n\ | -  |  | SWEDEN, Westrobothnia province, Storuman, 65°05'16"N; 17°06'51"E, 08.08.2012, S. Nokkala & Ch. Nokkala leg. |
| <i>C. myrtilli</i> | CMST_f10   | f | n\ | -  |  | SWEDEN, Westrobothnia province, Storuman, 65°05'16"N; 17°06'51"E, 08.08.2012, S. Nokkala & Ch. Nokkala leg. |
| <i>C. myrtilli</i> | CMST_f11   | f | n\ | +  |  | SWEDEN, Westrobothnia province, Storuman, 65°05'16"N; 17°06'51"E, 08.08.2012, S. Nokkala & Ch. Nokkala leg. |
| <i>C. myrtilli</i> | CMST_f16   | f | -  | -  |  | SWEDEN, Westrobothnia province, Storuman, 65°05'16"N; 17°06'51"E, 08.08.2012, S. Nokkala & Ch. Nokkala leg. |
| <i>C. myrtilli</i> | CMST_f17   | f | -  | -  |  | SWEDEN, Westrobothnia province, Storuman, 65°05'16"N; 17°06'51"E, 08.08.2012, S. Nokkala & Ch. Nokkala leg. |
| <i>C. myrtilli</i> | CMST_f18   | f | +  | +  |  | SWEDEN, Westrobothnia province, Storuman, 65°05'16"N; 17°06'51"E, 08.08.2012, S. Nokkala & Ch. Nokkala leg. |
| <i>C. myrtilli</i> | CMST_f19   | f | -  | -  |  | SWEDEN, Westrobothnia province, Storuman, 65°05'16"N; 17°06'51"E, 08.08.2012, S. Nokkala & Ch. Nokkala leg. |



|                    |             |   |   |   |                                                                                                                                  |
|--------------------|-------------|---|---|---|----------------------------------------------------------------------------------------------------------------------------------|
| <i>C. myrtilli</i> | CMST_f20    | f | + | + | SWEDEN, Westrobothnia province, Storuman, 65°05'16"N; 17°06'51"E, 08.08.2012, S. Nokkala & Ch. Nokkala leg.                      |
| <i>C. myrtilli</i> | CMST_f21    | f | - | - | SWEDEN, Westrobothnia province, Storuman, 65°05'16"N; 17°06'51"E, 08.08.2012, S. Nokkala & Ch. Nokkala leg.                      |
| <i>C. myrtilli</i> | CMFIJUO_f7  | f | - | - | NORWAY, Troms og Finnmark county, Suoššjavri, 69°22'11"N; 24°18'20"E, 18.08.2011, S. Nokkala & Ch. Nokkala leg.                  |
| <i>C. myrtilli</i> | CMFIJUO_f8  | f | + | + | NORWAY, Troms og Finnmark county, Suoššjavri, 69°22'11"N; 24°18'20"E, 18.08.2011, S. Nokkala & Ch. Nokkala leg.                  |
| <i>C. myrtilli</i> | CMFIJUO_f9  | f | - | - | NORWAY, Troms og Finnmark county, Suoššjavri, 69°22'11"N; 24°18'20"E, 18.08.2011, S. Nokkala & Ch. Nokkala leg.                  |
| <i>C. myrtilli</i> | CMFIJUO_f10 | f | - | - | NORWAY, Troms og Finnmark county, Suoššjavri, 69°22'11"N; 24°18'20"E, 18.08.2011, S. Nokkala & Ch. Nokkala leg.                  |
| <i>C. myrtilli</i> | CMFIJUO_f11 | f | - | - | NORWAY, Troms og Finnmark county, Suoššjavri, 69°22'11"N; 24°18'20"E, 18.08.2011, S. Nokkala & Ch. Nokkala leg.                  |
| <i>C. myrtilli</i> | CMFIJUO_f12 | f | - | - | NORWAY, Troms og Finnmark county, Suoššjavri, 69°22'11"N; 24°18'20"E, 18.08.2011, S. Nokkala & Ch. Nokkala leg.                  |
| <i>C. myrtilli</i> | CMFI_f13    | f | - | - | NORWAY, Troms og Finnmark county, Suoššjavri, 69°22'11"N; 24°18'20"E, 18.08.2011, S. Nokkala & Ch. Nokkala leg.                  |
| <i>C. myrtilli</i> | CMFI_f14    | f | + | + | NORWAY, Troms og Finnmark county, Suoššjavri, 69°22'11"N; 24°18'20"E, 18.08.2011, S. Nokkala & Ch. Nokkala leg.                  |
| <i>C. myrtilli</i> | CMFI_f15    | f | + | + | NORWAY, Troms og Finnmark county, Suoššjavri, 69°22'11"N; 24°18'20"E, 18.08.2011, S. Nokkala & Ch. Nokkala leg.                  |
| <i>C. myrtilli</i> | CMFI_f16    | f | + | - | NORWAY, Troms og Finnmark county, Suoššjavri, 69°22'11"N; 24°18'20"E, 18.08.2011, S. Nokkala & Ch. Nokkala leg.                  |
| <i>C. myrtilli</i> | CMFI_f17    | f | + | + | NORWAY, Troms og Finnmark county, Suoššjavri, 69°22'11"N; 24°18'20"E, 18.08.2011, S. Nokkala & Ch. Nokkala leg.                  |
| <i>C. myrtilli</i> | CMFI_f18    | f | - | - | NORWAY, Troms og Finnmark county, Suoššjavri, 69°22'11"N; 24°18'20"E, 18.08.2011, S. Nokkala & Ch. Nokkala leg.                  |
| <i>C. myrtilli</i> | CMKLHf09-13 | f | - | - | NORWAY, Innlandet county, Sjoa, Kringlothaugen mt., 61°43'06"N; 09°22'40"E, h = 700 m, 01.08.2009, S. Nokkala & Ch. Nokkala leg. |
| <i>C. myrtilli</i> | CMKLHf09-14 | f | - | - | NORWAY, Innlandet county, Sjoa, Kringlothaugen mt., 61°43'06"N; 09°22'40"E, h = 700 m, 01.08.2009, S. Nokkala & Ch. Nokkala leg. |
| <i>C. myrtilli</i> | CMKLHf09-15 | f | - | - | NORWAY, Innlandet county, Sjoa, Kringlothaugen mt., 61°43'06"N; 09°22'40"E, h = 700 m, 01.08.2009, S. Nokkala & Ch. Nokkala leg. |
| <i>C. myrtilli</i> | CMKLHf09-16 | f | - | - | NORWAY, Innlandet county, Sjoa, Kringlothaugen mt., 61°43'06"N; 09°22'40"E, h = 700 m, 01.08.2009, S. Nokkala & Ch. Nokkala leg. |
| <i>C. myrtilli</i> | CMKLHf09-17 | f | - | - | NORWAY, Innlandet county, Sjoa, Kringlothaugen mt., 61°43'06"N; 09°22'40"E, h = 700 m, 01.08.2009, S. Nokkala & Ch. Nokkala leg. |

|                    |             |   |   |   |                                                                                                                                  |
|--------------------|-------------|---|---|---|----------------------------------------------------------------------------------------------------------------------------------|
| <i>C. myrtilli</i> | CMKLHf09-18 | f | - | - | NORWAY, Innlandet county, Sjoa, Kringlothaugen mt., 61°43'06"N; 09°22'40"E, h = 700 m, 01.08.2009, S. Nokkala & Ch. Nokkala leg. |
| <i>C. myrtilli</i> | CMKV_f09-19 | f | - | - | NORWAY, Innlandet county, Sjoa, Kvernbrusaetrin, 61°42'27"N; 09°19'25"E, h = 1100 m, 01.08.2009, S. Nokkala & Ch. Nokkala leg.   |
| <i>C. myrtilli</i> | CMKV_f09-20 | f | - | - | NORWAY, Innlandet county, Sjoa, Kvernbrusaetrin, 61°42'27"N; 09°19'25"E, h = 1100 m, 01.08.2009, S. Nokkala & Ch. Nokkala leg.   |
| <i>C. myrtilli</i> | CMKV_f09-21 | f | - | - | NORWAY, Innlandet county, Sjoa, Kvernbrusaetrin, 61°42'27"N; 09°19'25"E, h = 1100 m, 01.08.2009, S. Nokkala & Ch. Nokkala leg.   |
| <i>C. myrtilli</i> | CMKV_f09-22 | f | - | - | NORWAY, Innlandet county, Sjoa, Kvernbrusaetrin, 61°42'27"N; 09°19'25"E, h = 1100 m, 01.08.2009, S. Nokkala & Ch. Nokkala leg.   |
| <i>C. myrtilli</i> | CMKV_f09-23 | f | - | - | NORWAY, Innlandet county, Sjoa, Kvernbrusaetrin, 61°42'27"N; 09°19'25"E, h = 1100 m, 01.08.2009, S. Nokkala & Ch. Nokkala leg.   |
| <i>C. myrtilli</i> | CMKV_f09-24 | f | - | - | NORWAY, Innlandet county, Sjoa, Kvernbrusaetrin, 61°42'27"N; 09°19'25"E, h = 1100 m, 01.08.2009, S. Nokkala & Ch. Nokkala leg.   |
| <i>C. myrtilli</i> | CMST_f09-18 | f | - | - | NORWAY, Innlandet county, Sjoa, Stålane, 61°41'15"N; 09°14'27"E, h = 1100 m, 01.08.2009, S. Nokkala & Ch. Nokkala leg.           |
| <i>C. myrtilli</i> | CMST_f09-19 | f | - | - | NORWAY, Innlandet county, Sjoa, Stålane, 61°41'15"N; 09°14'27"E, h = 1100 m, 01.08.2009, S. Nokkala & Ch. Nokkala leg.           |
| <i>C. myrtilli</i> | CMST_f09-20 | f | - | - | NORWAY, Innlandet county, Sjoa, Stålane, 61°41'15"N; 09°14'27"E, h = 1100 m, 01.08.2009, S. Nokkala & Ch. Nokkala leg.           |
| <i>C. myrtilli</i> | CMST_f09-21 | f | - | - | NORWAY, Innlandet county, Sjoa, Stålane, 61°41'15"N; 09°14'27"E, h = 1100 m, 01.08.2009, S. Nokkala & Ch. Nokkala leg.           |
| <i>C. myrtilli</i> | CMST_f09-22 | f | - | - | NORWAY, Innlandet county, Sjoa, Stålane, 61°41'15"N; 09°14'27"E, h = 1100 m, 01.08.2009, S. Nokkala & Ch. Nokkala leg.           |
| <i>C. myrtilli</i> | CMST_f09-23 | f | - | - | NORWAY, Innlandet county, Sjoa, Stålane, 61°41'15"N; 09°14'27"E, h = 1100 m, 01.08.2009, S. Nokkala & Ch. Nokkala leg.           |
| <i>C. myrtilli</i> | CMST_f12-24 | f | - | - | NORWAY, Innlandet county, Sjoa, Stålane, 61°41'15"N; 09°14'27"E, h = 1100 m, 01.08.2009, S. Nokkala & Ch. Nokkala leg.           |
| <i>C. myrtilli</i> | CMST_f12-25 | f | - | - | NORWAY, Innlandet county, Sjoa, Stålane, 61°41'15"N; 09°14'27"E, h = 1100 m, 01.08.2009, S. Nokkala & Ch. Nokkala leg.           |
| <i>C. myrtilli</i> | CMST_f12-26 | f | - | - | NORWAY, Innlandet county, Sjoa, Stålane, 61°41'15"N; 09°14'27"E, h = 1100 m, 01.08.2009, S. Nokkala & Ch. Nokkala leg.           |
| <i>C. myrtilli</i> | CMST_f12-27 | f | - | - | NORWAY, Innlandet county, Sjoa, Stålane, 61°41'15"N; 09°14'27"E, h = 1100 m, 01.08.2009, S. Nokkala & Ch. Nokkala leg.           |
| <i>C. myrtilli</i> | CMST_f12-28 | f | - | - | NORWAY, Innlandet county, Sjoa, Stålane, 61°41'15"N; 09°14'27"E, h = 1100 m, 01.08.2009, S. Nokkala & Ch. Nokkala leg.           |
| <i>C. myrtilli</i> | CMST_f12-29 | f | - | - | NORWAY, Innlandet county, Sjoa, Stålane, 61°41'15"N; 09°14'27"E, h = 1100 m, 01.08.2009, S. Nokkala & Ch. Nokkala leg.           |

[illegible]

|                    |            |   |      |   |                                                                                                                          |
|--------------------|------------|---|------|---|--------------------------------------------------------------------------------------------------------------------------|
| <i>C. myrtilli</i> | CMRI_f21   | f | -    | - | NORWAY, Innlandet county, Sjoa, Rindhovda, 61°43'05"N; 09°05'12"E, h = 1080 m, 16.08.2010, S. Nokkala & Ch. Nokkala leg. |
| <i>C. myrtilli</i> | CMRI_f22   | f | -    | - | NORWAY, Innlandet county, Sjoa, Rindhovda, 61°43'05"N; 09°05'12"E, h = 1080 m, 16.08.2010, S. Nokkala & Ch. Nokkala leg. |
| <i>C. myrtilli</i> | CMRI_f23   | f | -    | - | NORWAY, Innlandet county, Sjoa, Rindhovda, 61°43'05"N; 09°05'12"E, h = 1080 m, 16.08.2010, S. Nokkala & Ch. Nokkala leg. |
| <i>C. myrtilli</i> | CMRI_f24   | f | -    | - | NORWAY, Innlandet county, Sjoa, Rindhovda, 61°43'05"N; 09°05'12"E, h = 1080 m, 16.08.2010, S. Nokkala & Ch. Nokkala leg. |
| <i>C. myrtilli</i> | CMKILD_f1  | f | -    | - | RUSSIA, Murmansk region, Barents Sea, Kildin Island, 69°19'58"N; 34°23'43"E, 05.08.2016, P. Strelkov leg.                |
| <i>C. myrtilli</i> | CMKILD_f2  | f | -    | - | RUSSIA, Murmansk region, Barents Sea, Kildin Island, 69°19'58"N; 34°23'43"E, 05.08.2016, P. Strelkov leg.                |
| <i>C. myrtilli</i> | CMKILD_f3  | f | -    | - | RUSSIA, Murmansk region, Barents Sea, Kildin Island, 69°19'58"N; 34°23'43"E, 05.08.2016, P. Strelkov leg.                |
| <i>C. myrtilli</i> | CMKILD_f4  | f | -    | - | RUSSIA, Murmansk region, Barents Sea, Kildin Island, 69°19'58"N; 34°23'43"E, 05.08.2016, P. Strelkov leg.                |
| <i>C. myrtilli</i> | CMKILD_f5  | f | -    | - | RUSSIA, Murmansk region, Barents Sea, Kildin Island, 69°19'58"N; 34°23'43"E, 05.08.2016, P. Strelkov leg.                |
| <i>C. myrtilli</i> | CMKILD_f6  | f | -    | - | RUSSIA, Murmansk region, Barents Sea, Kildin Island, 69°19'58"N; 34°23'43"E, 05.08.2016, P. Strelkov leg.                |
| <i>C. myrtilli</i> | CMKILD_f7  | f | -    | - | RUSSIA, Murmansk region, Barents Sea, Kildin Island, 69°19'58"N; 34°23'43"E, 05.08.2016, P. Strelkov leg.                |
| <i>C. myrtilli</i> | CMKILD_f8  | f | -    | - | RUSSIA, Murmansk region, Barents Sea, Kildin Island, 69°19'58"N; 34°23'43"E, 05.08.2016, P. Strelkov leg.                |
| <i>C. myrtilli</i> | CMKILD_f9  | f | -    | - | RUSSIA, Murmansk region, Barents Sea, Kildin Island, 69°19'58"N; 34°23'43"E, 05.08.2016, P. Strelkov leg.                |
| <i>C. myrtilli</i> | CMKILD_f10 | f | -    | - | RUSSIA, Murmansk region, Barents Sea, Kildin Island, 69°19'58"N; 34°23'43"E, 05.08.2016, P. Strelkov leg.                |
| <i>C. myrtilli</i> | CMKILD_f11 | f | -    | - | RUSSIA, Murmansk region, Barents Sea, Kildin Island, 69°19'58"N; 34°23'43"E, 05.08.2016, P. Strelkov leg.                |
| <i>C. myrtilli</i> | CMKILD_f12 | f | -    | - | RUSSIA, Murmansk region, Barents Sea, Kildin Island, 69°19'58"N; 34°23'43"E, 05.08.2016, P. Strelkov leg.                |
| <i>C. myrtilli</i> | CMKILD_f13 | f | n\ a | - | RUSSIA, Murmansk region, Barents Sea, Kildin Island, 69°19'58"N; 34°23'43"E, 05.08.2016, P. Strelkov leg.                |
| <i>C. myrtilli</i> | CMKILD_f14 | f | n\ a | - | RUSSIA, Murmansk region, Barents Sea, Kildin Island, 69°19'58"N; 34°23'43"E, 05.08.2016, P. Strelkov leg.                |
| <i>C. myrtilli</i> | CMKILD_f25 | f | n\ a | - | RUSSIA, Murmansk region, Barents Sea, Kildin Island, 69°19'58"N; 34°23'43"E, 05.08.2016, P. Strelkov leg.                |

|                    |            |   |     |     |  |                                                                                                                                      |
|--------------------|------------|---|-----|-----|--|--------------------------------------------------------------------------------------------------------------------------------------|
| <i>C. myrtilli</i> | CMKILD_f26 | f | n\а | -   |  | RUSSIA, Murmansk region, Barents Sea, Kildin Island, 69°19'58"N; 34°23'43"E, 05.08.2016, P. Strelkov leg.                            |
| <i>C. myrtilli</i> | CMKILD_f27 | f | n\а | -   |  | RUSSIA, Murmansk region, Barents Sea, Kildin Island, 69°19'58"N; 34°23'43"E, 05.08.2016, P. Strelkov leg.                            |
| <i>C. myrtilli</i> | CMKILD_f28 | f | n\а | -   |  | RUSSIA, Murmansk region, Barents Sea, Kildin Island, 69°19'58"N; 34°23'43"E, 05.08.2016, P. Strelkov leg.                            |
| <i>C. myrtilli</i> | CM4.1      | m | -   | -   |  | RUSSIA, Murmansk region, Laplandsky Natural Reserve, 68°07'N; 32°27'E, 01.08.2019, A. Polevoi leg.                                   |
| <i>C. myrtilli</i> | CM4.2      | m | -   | -   |  | RUSSIA, Murmansk region, Laplandsky Natural Reserve, 68°07'N; 32°27'E, 01.08.2019, A. Polevoi leg.                                   |
| <i>C. myrtilli</i> | CM7.1      | m | -   | -   |  | RUSSIA, Murmansk region, Laplandsky Natural Reserve, 68°07'N; 32°27'E, 01.08.2019, A. Polevoi leg.                                   |
| <i>C. myrtilli</i> | CM7.2      | f | -   | -   |  | RUSSIA, Murmansk region, Laplandsky Natural Reserve, 68°07'N; 32°27'E, 01.08.2019, A. Polevoi leg.                                   |
| <i>C. myrtilli</i> | CM7.3      | f | +   | +   |  | RUSSIA, Murmansk region, Laplandsky Natural Reserve, 68°07'N; 32°27'E, 01.08.2019, A. Polevoi leg.                                   |
| <i>C. myrtilli</i> | CM7.4      | f | +   | +   |  | RUSSIA, Murmansk region, Laplandsky Natural Reserve, 68°07'N; 32°27'E, 01.08.2019, A. Polevoi leg.                                   |
| <i>C. myrtilli</i> | CM7.5      | f | -   | -   |  | RUSSIA, Murmansk region, Laplandsky Natural Reserve, 68°07'N; 32°27'E, 01.08.2019, A. Polevoi leg.                                   |
| <i>C. myrtilli</i> | CM7.6      | f | +   | +   |  | RUSSIA, Murmansk region, Laplandsky Natural Reserve, 68°07'N; 32°27'E, 01.08.2019, A. Polevoi leg.                                   |
| <i>C. myrtilli</i> | CM7.7      | f | +   | +   |  | RUSSIA, Murmansk region, Laplandsky Natural Reserve, 68°07'N; 32°27'E, 01.08.2019, A. Polevoi leg.                                   |
| <i>C. myrtilli</i> | CM7.8      | f | -   | -   |  | RUSSIA, Murmansk region, Laplandsky Natural Reserve, 68°07'N; 32°27'E, 01.08.2019, A. Polevoi leg.                                   |
| <i>C. myrtilli</i> | CM7.9      | f | +   | +   |  | RUSSIA, Murmansk region, Laplandsky Natural Reserve, 68°07'N; 32°27'E, 01.08.2019, A. Polevoi leg.                                   |
| <i>C. myrtilli</i> | CM7.10     | f | -   | -   |  | RUSSIA, Murmansk region, Laplandsky Natural Reserve, 68°07'N; 32°27'E, 01.08.2019, A. Polevoi leg.                                   |
| <i>C. myrtilli</i> | CM7.11     | f | +   | +   |  | RUSSIA, Murmansk region, Laplandsky Natural Reserve, 68°07'N; 32°27'E, 01.08.2019, A. Polevoi leg.                                   |
| <i>C. myrtili</i>  | CMKOL_f1   | f | -   | n\а |  | RUSSIA, Karelia Republic, White Sea, vic. Kolezma vill., 64°14'46"N 35°48'49"E, 30.09.2020, V. Kuznetsova & P. Strelkov leg.         |
| <i>C. myrtilli</i> | CM5.1      | f | -   | -   |  | RUSSIA, Karelia Republic, Louchskiy district, "Belomorskaya" Research Station, 66°17'58"N; 33°37'18"E, 29.08.2019, G. Paskerova leg. |
| <i>C. myrtilli</i> | CM5.2      | f | +   | +   |  | RUSSIA, Karelia Republic, Louchskiy district, "Belomorskaya" Research Station, 66°17'58"N; 33°37'18"E, 29.08.2019, G. Paskerova leg. |

|                    |        |   |   |   |                                                                                                                                      |
|--------------------|--------|---|---|---|--------------------------------------------------------------------------------------------------------------------------------------|
| <i>C. myrtilli</i> | CM5.3  | f | - | - | RUSSIA, Karelia Republic, Louchskiy district, "Belomorskaya" Research Station, 66°17'58"N; 33°37'18"E, 29.08.2019, G. Paskerova leg. |
| <i>C. myrtilli</i> | CM5.4  | f | + | + | RUSSIA, Karelia Republic, Louchskiy district, "Belomorskaya" Research Station, 66°17'58"N; 33°37'18"E, 29.08.2019, G. Paskerova leg. |
| <i>C. myrtilli</i> | CM5.5  | f | - | - | RUSSIA, Karelia Republic, Louchskiy district, "Belomorskaya" Research Station, 66°17'58"N; 33°37'18"E, 29.08.2019, G. Paskerova leg. |
| <i>C. myrtilli</i> | CM5.6  | f | - | - | RUSSIA, Karelia Republic, Louchskiy district, "Belomorskaya" Research Station, 66°17'58"N; 33°37'18"E, 29.08.2019, G. Paskerova leg. |
| <i>C. myrtilli</i> | CM5.7  | f | - | - | RUSSIA, Karelia Republic, Louchskiy district, "Belomorskaya" Research Station, 66°17'58"N; 33°37'18"E, 29.08.2019, G. Paskerova leg. |
| <i>C. myrtilli</i> | CM5.8  | f | - | - | RUSSIA, Karelia Republic, Louchskiy district, "Belomorskaya" Research Station, 66°17'58"N; 33°37'18"E, 29.08.2019, G. Paskerova leg. |
| <i>C. myrtilli</i> | CM5.9  | f | - | - | RUSSIA, Karelia Republic, Louchskiy district, "Belomorskaya" Research Station, 66°17'58"N; 33°37'18"E, 29.08.2019, G. Paskerova leg. |
| <i>C. myrtilli</i> | CM5.10 | f | - | - | RUSSIA, Karelia Republic, Louchskiy district, "Belomorskaya" Research Station, 66°17'58"N; 33°37'18"E, 29.08.2019, G. Paskerova leg. |
| <i>C. myrtilli</i> | CM1.1  | f | - | - | RUSSIA, Karelia Republic, White Sea, Sredniy Island, 66°17'28"N; 33°39'06"E, 21.08.2017, G. Paskerova leg.                           |
| <i>C. myrtilli</i> | CM1.2  | f | + | + | RUSSIA, Karelia Republic, White Sea, Sredniy Island, 66°17'28"N; 33°39'06"E, 21.08.2017, G. Paskerova leg.                           |
| <i>C. myrtilli</i> | CM1.3  | f | + | + | RUSSIA, Karelia Republic, White Sea, Sredniy Island, 66°17'28"N; 33°39'06"E, 21.08.2017, G. Paskerova leg.                           |
| <i>C. myrtilli</i> | CM1.4  | f | - | - | RUSSIA, Karelia Republic, White Sea, Sredniy Island, 66°17'28"N; 33°39'06"E, 21.08.2017, G. Paskerova leg.                           |
| <i>C. myrtilli</i> | CM1.5  | f | - | - | RUSSIA, Karelia Republic, White Sea, Sredniy Island, 66°17'28"N; 33°39'06"E, 21.08.2017, G. Paskerova leg.                           |
| <i>C. myrtilli</i> | CM1.6  | f | - | - | RUSSIA, Karelia Republic, White Sea, Sredniy Island, 66°17'28"N; 33°39'06"E, 21.08.2017, G. Paskerova leg.                           |
| <i>C. myrtilli</i> | CM1.7  | f | - | - | RUSSIA, Karelia Republic, White Sea, Sredniy Island, 66°17'28"N; 33°39'06"E, 21.08.2017, G. Paskerova leg.                           |
| <i>C. myrtilli</i> | CM1a.1 | f | - | - | RUSSIA, Karelia Republic, White Sea, Sredniy Island, 66°17'28"N; 33°39'06"E, 21.08.2017, G. Paskerova leg.                           |
| <i>C. myrtilli</i> | CM1a.2 | f | + | + | RUSSIA, Karelia Republic, White Sea, Sredniy Island, 66°17'28"N; 33°39'06"E, 21.08.2017, G. Paskerova leg.                           |
| <i>C. myrtilli</i> | CM1a.3 | f | + | + | RUSSIA, Karelia Republic, White Sea, Sredniy Island, 66°17'28"N; 33°39'06"E, 21.08.2017, G. Paskerova leg.                           |
| <i>C. myrtilli</i> | CM1a.4 | f | - | - | RUSSIA, Karelia Republic, White Sea, Sredniy Island, 66°17'28"N; 33°39'06"E, 21.08.2017, G. Paskerova leg.                           |

|                    |          |   |     |   |                                                                                                            |
|--------------------|----------|---|-----|---|------------------------------------------------------------------------------------------------------------|
| <i>C. myrtilli</i> | CM1a.5   | f | +   | + | RUSSIA, Karelia Republic, White Sea, Sredniy Island, 66°17'28"N; 33°39'06"E, 21.08.2017, G. Paskerova leg. |
| <i>C. myrtilli</i> | CM2.1    | f | +   | + | RUSSIA, Karelia Republic, White Sea, Sredniy Island, 66°17'28"N; 33°39'06"E, 21.08.2017, G. Paskerova leg. |
| <i>C. myrtilli</i> | CM2.2    | f | -   | - | RUSSIA, Karelia Republic, White Sea, Sredniy Island, 66°17'28"N; 33°39'06"E, 21.08.2017, G. Paskerova leg. |
| <i>C. myrtilli</i> | CM2.3    | f | -   | - | RUSSIA, Karelia Republic, White Sea, Sredniy Island, 66°17'28"N; 33°39'06"E, 21.08.2017, G. Paskerova leg. |
| <i>C. myrtilli</i> | CM2.4    | f | -   | - | RUSSIA, Karelia Republic, White Sea, Sredniy Island, 66°17'28"N; 33°39'06"E, 21.08.2017, G. Paskerova leg. |
| <i>C. myrtilli</i> | CM2.5    | f | -   | - | RUSSIA, Karelia Republic, White Sea, Sredniy Island, 66°17'28"N; 33°39'06"E, 21.08.2017, G. Paskerova leg. |
| <i>C. myrtilli</i> | CM3.1    | f | -   | - | RUSSIA, Karelia Republic, vic. Kem' city, 2017.                                                            |
| <i>C. myrtilli</i> | CM3.2    | f | +   | + | RUSSIA, Karelia Republic, vic. Kem' city, 2017.                                                            |
| <i>C. myrtilli</i> | CM3.3    | f | -   | - | RUSSIA, Karelia Republic, vic. Kem' city, 2017.                                                            |
| <i>C. myrtilli</i> | CM3.4    | f | -   | - | RUSSIA, Karelia Republic, vic. Kem' city, 2017.                                                            |
| <i>C. myrtilli</i> | CM3.5    | f | -   | - | RUSSIA, Karelia Republic, vic. Kem' city, 2017.                                                            |
| <i>C. myrtilli</i> | CM3.6    | f | +   | + | RUSSIA, Karelia Republic, vic. Kem' city, 2017.                                                            |
| <i>C. myrtilli</i> | CM3.7    | f | -   | - | RUSSIA, Karelia Republic, vic. Kem' city, 2017.                                                            |
| <i>C. myrtilli</i> | CM3.8    | f | -   | - | RUSSIA, Karelia Republic, vic. Kem' city, 2017.                                                            |
| <i>C. myrtilli</i> | CM3.9    | f | -   | - | RUSSIA, Karelia Republic, vic. Kem' city, 2017.                                                            |
| <i>C. myrtilli</i> | CM3.10   | f | -   | - | RUSSIA, Karelia Republic, vic. Kem' city, 2017.                                                            |
| <i>C. myrtilli</i> | CM3.11   | f | -   | - | RUSSIA, Karelia Republic, vic. Kem' city, 2017.                                                            |
| <i>C. myrtilli</i> | CM3.12   | f | -   | - | RUSSIA, Karelia Republic, vic. Kem' city, 2017.                                                            |
| <i>C. myrtilli</i> | CMMAG_f1 | f | n\а | - | RUSSIA, Magadan region, vic. Ola vill., 59°34'24"N; 150°46'04"E, 22.07.2020, Yu. Marusik & D. Berman leg.  |
| <i>C. myrtilli</i> | CMMAG_f2 | f | n\а | - | RUSSIA, Magadan region, vic. Ola vill., 59°34'24"N; 150°46'04"E, 22.07.2020, Yu. Marusik & D. Berman leg.  |
| <i>C. myrtilli</i> | CMMAG_f3 | f | n\а | - | RUSSIA, Magadan region, vic. Ola vill., 59°34'24"N; 150°46'04"E, 22.07.2020, Yu. Marusik & D. Berman leg.  |
| <i>C. myrtilli</i> | CMMAG_f4 | f | n\а | - | RUSSIA, Magadan region, vic. Ola vill., 59°34'24"N; 150°46'04"E, 22.07.2020, Yu. Marusik & D. Berman leg.  |
| <i>C. myrtilli</i> | CMMAG_f5 | f | n\а | - | RUSSIA, Magadan region, vic. Ola vill., 59°34'24"N; 150°46'04"E, 22.07.2020, Yu. Marusik & D. Berman leg.  |
| <i>C. myrtilli</i> | CMMAG_f6 | f | n\а | - | RUSSIA, Magadan region, vic. Ola vill., 59°34'24"N; 150°46'04"E, 22.07.2020, Yu. Marusik & D. Berman leg.  |

|                    |           |   |     |   |  |                                                                                                           |
|--------------------|-----------|---|-----|---|--|-----------------------------------------------------------------------------------------------------------|
| <i>C. myrtilli</i> | CMMAG_f7  | f | n\а | - |  | RUSSIA, Magadan region, vic. Ola vill., 59°34'24"N; 150°46'04"E, 22.07.2020, Yu. Marusik & D. Berman leg. |
| <i>C. myrtilli</i> | CMMAG_f8  | f | n\а | - |  | RUSSIA, Magadan region, vic. Ola vill., 59°34'24"N; 150°46'04"E, 22.07.2020, Yu. Marusik & D. Berman leg. |
| <i>C. myrtilli</i> | CMMAG_f9  | f | n\а | - |  | RUSSIA, Magadan region, vic. Ola vill., 59°34'24"N; 150°46'04"E, 22.07.2020, Yu. Marusik & D. Berman leg. |
| <i>C. myrtilli</i> | CMMAG_f10 | f | n\а | + |  | RUSSIA, Magadan region, vic. Ola vill., 59°34'24"N; 150°46'04"E, 22.07.2020, Yu. Marusik & D. Berman leg. |
| <i>C. myrtilli</i> | CMMAG_f11 | f | n\а | - |  | RUSSIA, Magadan region, vic. Ola vill., 59°34'24"N; 150°46'04"E, 22.07.2020, Yu. Marusik & D. Berman leg. |
| <i>C. myrtilli</i> | CMMAG_f12 | f | n\а | - |  | RUSSIA, Magadan region, vic. Ola vill., 59°34'24"N; 150°46'04"E, 22.07.2020, Yu. Marusik & D. Berman leg. |
| <i>C. myrtilli</i> | CMMAG_f13 | f | n\а | - |  | RUSSIA, Magadan region, vic. Ola vill., 59°34'24"N; 150°46'04"E, 22.07.2020, Yu. Marusik & D. Berman leg. |
| <i>C. myrtilli</i> | CMMAG_f14 | f | n\а | - |  | RUSSIA, Magadan region, vic. Ola vill., 59°34'24"N; 150°46'04"E, 22.07.2020, Yu. Marusik & D. Berman leg. |
| <i>C. myrtilli</i> | CMMAG_f15 | f | n\а | - |  | RUSSIA, Magadan region, vic. Ola vill., 59°34'24"N; 150°46'04"E, 22.07.2020, Yu. Marusik & D. Berman leg. |
| <i>C. myrtilli</i> | CMSYK_f1  | f | -   | - |  | RUSSIA, Komi Republic, 2km W of Syktyvkar city, 61°38'57"N; 50°44'09"E, 02.09.2020, A. Zinovieva leg.     |
| <i>C. myrtilli</i> | CMSYK_f2  | f | -   | - |  | RUSSIA, Komi Republic, 2km W of Syktyvkar city, 61°38'57"N; 50°44'09"E, 02.09.2020, A. Zinovieva leg.     |
| <i>C. myrtilli</i> | CMSYK_f3  | f | -   | - |  | RUSSIA, Komi Republic, 2km W of Syktyvkar city, 61°38'57"N; 50°44'09"E, 02.09.2020, A. Zinovieva leg.     |
| <i>C. myrtilli</i> | CMSYK_f4  | f | -   | - |  | RUSSIA, Komi Republic, 2km W of Syktyvkar city, 61°38'57"N; 50°44'09"E, 02.09.2020, A. Zinovieva leg.     |
| <i>C. myrtilli</i> | CMSYK_f5  | f | -   | - |  | RUSSIA, Komi Republic, 2km W of Syktyvkar city, 61°38'57"N; 50°44'09"E, 02.09.2020, A. Zinovieva leg.     |
| <i>C. myrtilli</i> | CMSYK_f6  | f | -   | - |  | RUSSIA, Komi Republic, 2km W of Syktyvkar city, 61°38'57"N; 50°44'09"E, 02.09.2020, A. Zinovieva leg.     |
| <i>C. myrtilli</i> | CMSYK_f7  | f | -   | - |  | RUSSIA, Komi Republic, 2km W of Syktyvkar city, 61°38'57"N; 50°44'09"E, 02.09.2020, A. Zinovieva leg.     |
| <i>C. myrtilli</i> | CMSYK_f8  | f | -   | - |  | RUSSIA, Komi Republic, 2km W of Syktyvkar city, 61°38'57"N; 50°44'09"E, 02.09.2020, A. Zinovieva leg.     |
| <i>C. myrtilli</i> | CMSYK_f9  | f | -   | - |  | RUSSIA, Komi Republic, 2km W of Syktyvkar city, 61°38'57"N; 50°44'09"E, 02.09.2020, A. Zinovieva leg.     |
| <i>C. myrtilli</i> | CMSYK_f10 | f | -   | - |  | RUSSIA, Komi Republic, 2km W of Syktyvkar city, 61°38'57"N; 50°44'09"E, 02.09.2020, A. Zinovieva leg.     |



|                    |            |   |   |   |                                                                                                                     |
|--------------------|------------|---|---|---|---------------------------------------------------------------------------------------------------------------------|
| <i>C. myrtilli</i> | CMSYK_f11  | f | - | - | RUSSIA, Komi Republic, 2km W of Syktyvkar city, 61°38'57"N; 50°44'09"E, 02.09.2020, A. Zinovieva leg.               |
| <i>C. myrtilli</i> | CMSYK_f12  | f | - | - | RUSSIA, Komi Republic, 2km W of Syktyvkar city, 61°38'57"N; 50°44'09"E, 02.09.2020, A. Zinovieva leg.               |
| <i>C. myrtilli</i> | CMSYK_f13  | f | - | - | RUSSIA, Komi Republic, 2km W of Syktyvkar city, 61°38'57"N; 50°44'09"E, 02.09.2020, A. Zinovieva leg.               |
| <i>C. myrtilli</i> | CMV_f14    | f | - | - | RUSSIA, Komi Republic, Vorkuta city, 67°27'34"N; 63°59'01"E, 06.08.2013, N. Kabazova & M. Mandelshtam leg.          |
| <i>C. myrtilli</i> | CMV_f15    | f | - | - | RUSSIA, Komi Republic, Vorkuta city, 67°27'34"N; 63°59'01"E, 06.08.2013, N. Kabazova & M. Mandelshtam leg.          |
| <i>C. myrtilli</i> | CMV_f16    | f | - | - | RUSSIA, Komi Republic, Vorkuta city, 67°27'34"N; 63°59'01"E, 06.08.2013, N. Kabazova & M. Mandelshtam leg.          |
| <i>C. myrtilli</i> | CMV_f17    | f | - | - | RUSSIA, Komi Republic, Vorkuta city, 67°27'34"N; 63°59'01"E, 06.08.2013, N. Kabazova & M. Mandelshtam leg.          |
| <i>C. myrtilli</i> | CMV_f18    | f | - | - | RUSSIA, Komi Republic, Vorkuta city, 67°27'34"N; 63°59'01"E, 06.08.2013, N. Kabazova & M. Mandelshtam leg.          |
| <i>C. myrtilli</i> | CMV_f19    | f | - | - | RUSSIA, Komi Republic, Vorkuta city, 67°27'34"N; 63°59'01"E, 06.08.2013, N. Kabazova & M. Mandelshtam leg.          |
| <i>C. myrtilli</i> | CMV_f20    | f | - | - | RUSSIA, Komi Republic, Vorkuta city, 67°27'34"N; 63°59'01"E, 06.08.2013, N. Kabazova & M. Mandelshtam leg.          |
| <i>C. myrtilli</i> | CMV_f21    | f | - | - | RUSSIA, Komi Republic, Vorkuta city, 67°27'34"N; 63°59'01"E, 06.08.2013, N. Kabazova & M. Mandelshtam leg.          |
| <i>C. myrtilli</i> | CMV_f22    | f | + | + | RUSSIA, Komi Republic, Vorkuta city, 67°27'34"N; 63°59'01"E, 06.08.2013, N. Kabazova & M. Mandelshtam leg.          |
| <i>C. myrtilli</i> | CMV_f23    | f | - | - | RUSSIA, Komi Republic, Vorkuta city, 67°27'34"N; 63°59'01"E, 06.08.2013, N. Kabazova & M. Mandelshtam leg.          |
| <i>C. myrtilli</i> | CMV_f24    | f | - | - | RUSSIA, Komi Republic, Vorkuta city, 67°27'34"N; 63°59'01"E, 06.08.2013, N. Kabazova & M. Mandelshtam leg.          |
| <i>C. myrtilli</i> | CMV_f25    | f | - | - | RUSSIA, Komi Republic, Vorkuta city, 67°27'34"N; 63°59'01"E, 06.08.2013, N. Kabazova & M. Mandelshtam leg.          |
| <i>C. myrtilli</i> | CMKEM_f5.1 | f | - | - | RUSSIA, Kemerovo region, Kemerovskiy district, vic. Voskresenka vill., 55°19'N; 86°48'E, July 2019. A. Polevoi leg. |
| <i>C. myrtilli</i> | CMKEM_f5.2 | f | - | - | RUSSIA, Kemerovo region, Kemerovskiy district, vic. Voskresenka vill., 55°19'N; 86°48'E, July 2019. A. Polevoi leg. |
| <i>C. myrtilli</i> | CMKEM_f5.3 | f | - | - | RUSSIA, Kemerovo region, Kemerovskiy district, vic. Voskresenka vill., 55°19'N; 86°48'E, July 2019. A. Polevoi leg. |
| <i>C. myrtilli</i> | CMKEM_f5.4 | f | - | - | RUSSIA, Kemerovo region, Kemerovskiy district, vic. Voskresenka vill., 55°19'N; 86°48'E, July 2019. A. Polevoi leg. |

|                    |             |   |   |   |                                                                                                                        |
|--------------------|-------------|---|---|---|------------------------------------------------------------------------------------------------------------------------|
| <i>C. myrtilli</i> | CMKEM_f5.5  | f | - | - | RUSSIA, Kemerovo region, Kemerovskiy district, vic. Voskresenka vill., 55°19'N; 86°48'E, July 2019. A. Polevoi leg.    |
| <i>C. myrtilli</i> | CMKEM_f5.6  | f | - | - | RUSSIA, Kemerovo region, Kemerovskiy district, vic. Voskresenka vill., 55°19'N; 86°48'E, July 2019. A. Polevoi leg.    |
| <i>C. myrtilli</i> | CMKEM_f5.7  | f | - | - | RUSSIA, Kemerovo region, Kemerovskiy district, vic. Voskresenka vill., 55°19'N; 86°48'E, July 2019. A. Polevoi leg.    |
| <i>C. myrtilli</i> | CMKEM_f5.8  | f | - | - | RUSSIA, Kemerovo region, Kemerovskiy district, vic. Voskresenka vill., 55°19'N; 86°48'E, July 2019. A. Polevoi leg.    |
| <i>C. myrtilli</i> | CMKEM_f5.9  | f | - | - | RUSSIA, Kemerovo region, Kemerovskiy district, vic. Voskresenka vill., 55°19'N; 86°48'E, July 2019. A. Polevoi leg.    |
| <i>C. myrtilli</i> | CMKEM_f5.10 | f | - | - | RUSSIA, Kemerovo region, Kemerovskiy district, vic. Voskresenka vill., 55°19'N; 86°48'E, July 2019. A. Polevoi leg.    |
| <i>C. myrtilli</i> | CMKEM_f5.11 | f | - | - | RUSSIA, Kemerovo region, Kemerovskiy district, vic. Voskresenka vill., 55°19'N; 86°48'E, July 2019. A. Polevoi leg.    |
| <i>C. myrtilli</i> | CMKEM_f5.12 | f | - | - | RUSSIA, Kemerovo region, Kemerovskiy district, vic. Voskresenka vill., 55°19'N; 86°48'E, July 2019. A. Polevoi leg.    |
| <i>C. myrtilli</i> | CM6.1       | m | - | - | KAZAKHSTAN, Zyrjanovsky district, ca. 30 km N of Zyrjanovsk city, 50°00'05"N; 84°13'32"E, 11.07.2012, V. Lukhtanov leg |
| <i>C. myrtilli</i> | CM6.2       | f | - | - | KAZAKHSTAN, Zyrjanovsky district, ca. 30 km N of Zyrjanovsk city, 50°00'05"N; 84°13'32"E, 11.07.2012, V. Lukhtanov leg |
| <i>C. myrtilli</i> | CM6.3       | f | - | - | KAZAKHSTAN, Zyrjanovsky district, ca. 30 km N of Zyrjanovsk city, 50°00'05"N; 84°13'32"E, 11.07.2012, V. Lukhtanov leg |
| <i>C. myrtilli</i> | CM6.4       | f | - | - | KAZAKHSTAN, Zyrjanovsky district, ca. 30 km N of Zyrjanovsk city, 50°00'05"N; 84°13'32"E, 11.07.2012, V. Lukhtanov leg |
| <i>C. myrtilli</i> | CM6.5       | f | - | - | KAZAKHSTAN, Zyrjanovsky district, ca. 30 km N of Zyrjanovsk city, 50°00'05"N; 84°13'32"E, 11.07.2012, V. Lukhtanov leg |
| <i>C. myrtilli</i> | CM6.6       | f | - | - | KAZAKHSTAN, Zyrjanovsky district, ca. 30 km N of Zyrjanovsk city, 50°00'05"N; 84°13'32"E, 11.07.2012, V. Lukhtanov leg |
| <i>C. myrtilli</i> | CM6.7       | f | - | - | KAZAKHSTAN, Zyrjanovsky district, ca. 30 km N of Zyrjanovsk city, 50°00'05"N; 84°13'32"E, 11.07.2012, V. Lukhtanov leg |
| <i>C. myrtilli</i> | CM6.8       | f | - | - | KAZAKHSTAN, Zyrjanovsky district, ca. 30 km N of Zyrjanovsk city, 50°00'05"N; 84°13'32"E, 11.07.2012, V. Lukhtanov leg |
| <i>C. myrtilli</i> | CM6.9       | f | - | - | KAZAKHSTAN, Zyrjanovsky district, ca. 30 km N of Zyrjanovsk city, 50°00'05"N; 84°13'32"E, 11.07.2012, V. Lukhtanov leg |
| <i>C. myrtilli</i> | CM6.10      | f | + | + | KAZAKHSTAN, Zyrjanovsky district, ca. 30 km N of Zyrjanovsk city, 50°00'05"N; 84°13'32"E, 11.07.2012, V. Lukhtanov leg |
| <i>C. myrtilli</i> | CM6.11      | f | - | - | KAZAKHSTAN, Zyrjanovsky district, ca. 30 km N of Zyrjanovsk city, 50°00'05"N; 84°13'32"E, 11.07.2012, V. Lukhtanov leg |

[illegible]

|                    |           |   |      |   |  |                                                                                                                                            |
|--------------------|-----------|---|------|---|--|--------------------------------------------------------------------------------------------------------------------------------------------|
| <i>C. myrtilli</i> | CMM2_f8   | f | -    | - |  | CZECH REPUBLIC, Karlovy Vary region, Kleiner Kranichsee Natural Reserve, 50°23'33"N; 12°37'48"E, h = 915 m, 29.07.2020, I. Malinovsky leg. |
| <i>C. myrtilli</i> | CMM2_f9   | f | -    | - |  | CZECH REPUBLIC, Karlovy Vary region, Kleiner Kranichsee Natural Reserve, 50°23'33"N; 12°37'48"E, h = 915 m, 29.07.2020, I. Malinovsky leg. |
| <i>C. myrtilli</i> | CMM2_f10  | f | -    | - |  | CZECH REPUBLIC, Karlovy Vary region, Kleiner Kranichsee Natural Reserve, 50°23'33"N; 12°37'48"E, h = 915 m, 29.07.2020, I. Malinovsky leg. |
| <i>C. myrtilli</i> | CMM2_f11  | f | -    | - |  | CZECH REPUBLIC, Karlovy Vary region, Kleiner Kranichsee Natural Reserve, 50°23'33"N; 12°37'48"E, h = 915 m, 29.07.2020, I. Malinovsky leg. |
| <i>C. myrtilli</i> | CMM2_f12  | f | -    | - |  | CZECH REPUBLIC, Karlovy Vary region, Kleiner Kranichsee Natural Reserve, 50°23'33"N; 12°37'48"E, h = 915 m, 29.07.2020, I. Malinovsky leg. |
| <i>C. myrtilli</i> | CMRILA_f1 | f | n\ a | - |  | BULGARIA, Kyustendil province, Rila, Stara planina Mts., 42°06'N; 23°33'E, 17.08.2020, I. Gjonov leg.                                      |
| <i>C. myrtilli</i> | CMRILA_f2 | f | n\ a | - |  | BULGARIA, Kyustendil province, Rila, Stara planina Mts., 42°06'N; 23°33'E, 17.08.2020, I. Gjonov leg.                                      |
| <i>C. myrtilli</i> | CMRILA_f3 | f | n\ a | - |  | BULGARIA, Kyustendil province, Rila, Stara planina Mts., 42°06'N; 23°33'E, 17.08.2020, I. Gjonov leg.                                      |
| <i>C. myrtilli</i> | CMRILA_f4 | f | n\ a | - |  | BULGARIA, Kyustendil province, Rila, Stara planina Mts., 42°06'N; 23°33'E, 17.08.2020, I. Gjonov leg.                                      |
